# Supplementary material
Source: HighWire-hosted journal article supplement (https://bmjmedicine.bmj.com/highwire/filestream/974/field_highwire_adjunct_files/0/bmjmed-2023-000499supp001_data_supplement.pdf)
Supplement: bmjmed-2023-000499supp001_data_supplement.pdf [file bmjmed-2023-000499supp001_data_supplement.pdf]

**Supplementary table 1: list of Read codes taken to indicate transgender identity, and number of individuals with that code.**

| Read code | Description                                                | Number of individuals with code recorded |
|-----------|------------------------------------------------------------|------------------------------------------|
| Eu64.00   | [X]Gender identity disorders                               | 1481                                     |
| E22y400   | Gender role disorder of adolescent or adult                | 357                                      |
| 1K4..00   | Gender reassignment patient                                | 354                                      |
| Eu64000   | [X]Transsexualism                                          | 290                                      |
| ZV62A00   | [V] Gender dysphoria                                       | 244                                      |
| Eu64z11   | [X]Gender-role disorder NOS                                | 141                                      |
| 7LOB.00   | Operations for sexual transformation                       | 115                                      |
| Eu64z00   | [X]Gender identity disorder, unspecified                   | 93                                       |
| 7LOB000   | Combined operations for transformation from male to female | 55                                       |
| 7LOBz00   | Operation for sexual transformation NOS                    | 10                                       |
| Eu64y00   | [X]Other gender identity disorders                         | 9                                        |
| Eu64200   | [X]Gender identity disorder of childhood                   | 9                                        |
| 7LOB100   | Combined operations for transformation from female to male | 8                                        |
| E225z00   | Trans-sexualism NOS                                        | 6                                        |
| E225200   | Trans-sexuality with homosexual history                    | ≤5                                       |
| E225300   | Trans-sexuality with heterosexual history                  | ≤5                                       |
| E225000   | Trans-sexuality with unspecified sexual history            | ≤5                                       |
| E225100   | Trans-sexuality with asexual history                       | ≤5                                       |
| 7LOBy00   | Other specified operation for sexual transformation        | ≤5                                       |

*To preserve confidentiality, absolute counts of five or fewer individuals are suppressed.*

**Supplementary table 2: list of Read codes taken to indicate patient was likely assigned male at birth.**

|         |                                                              |         |                                                           |
|---------|--------------------------------------------------------------|---------|-----------------------------------------------------------|
| B483.00 | Malignant neoplasm of penis, part unspecified                | 7B36z11 | Prostatectomy NEC                                         |
| 7B3BC00 | Endoscopic radiofrequency ablation of lesion of prostate     | K27y300 | Fibrosis of penis                                         |
| 43ZB000 | Serum free prostate specific antigen level                   | 7C20000 | Total amputation of penis                                 |
| 7B36700 | Radical prostatectomy with pelvic lymphadenectomy            | 7B3B.11 | Trans-urethral microwave thermotherapy to prostate.       |
| 7B2AE00 | Diag endoscop examination bladder biopsy lesion prostate NEC | PCyy.00 | Other congenital anomaly of penis                         |
| 9OkD000 | Prostate specific antigen monitoring first letter            | K27y000 | Oedema of penis                                           |
| 7B3Cy00 | Other operation on outlet of male bladder or prostate OS     | 43ZB.00 | Free prostate specific antigen level                      |
| 7C05100 | Other one stage bilateral orchidopexy                        | B481.00 | Malignant neoplasm of glans penis                         |
| 7B3C.00 | Other operations on prostate or male bladder outlet          | 7C2..00 | Penis and other male genital organ operations             |
| 7B36600 | Radical prostatectomy with pelvic node sampling              | 4M02.00 | Gleason prostate grade 8-10 (high)                        |
| 7C25y00 | Other specified other operation on penis                     | PC50000 | Cryptorchidism, unilateral                                |
| 7B37400 | Open haemostasis of prostate                                 | 25QB.00 | On rectal exam of prostate NAD                            |
| 8Cd6.00 | Advice given about prostate cancer screening                 | ZV76800 | [V]Special screening examination for neoplasm of prostate |
| PC5..00 | Undescended testicle                                         | B7C1.00 | Benign neoplasm of penis                                  |
| 7C21300 | Cryotherapy to lesion of penis                               | K272.11 | Infection of penis                                        |
| 7B20200 | Radical cystoprostatectomy                                   | 7C22900 | Graft to penis                                            |
| 7B3CA00 | Transurethral radiofrequency needle ablation of prostate     | 7C06000 | Unilateral microvascular orchidopexy                      |
| 7B39311 | ELAP - Endoscopic laser ablation of prostate                 | SD11A00 | Abrasion of penis, infected                               |
| 7C02000 | Bilateral subcapsular orchidectomy                           | 7B36111 | Millin retropubic prostatectomy                           |
| B916000 | Neoplasm of uncertain behaviour of penis                     | 8A90.00 | Prostate-specific antigen monitoring                      |
| 7C02211 | Bilateral total inguinal orchidectomy                        | 85C3.00 | Inject prostate - local action                            |
| PCyy100 | Webbed penis                                                 | 7B39500 | Endoscopic resection of prostate using an electrotome     |
| 7B3B911 | Vapatrode prostatectomy                                      | K27y400 | Hypertrophy of penis                                      |
| SD15A00 | Insect bite, nonvenomous, of penis, infected                 | 7B37y00 | Other specified other open operation on prostate          |
| 7B39100 | Punch resection of prostate                                  | SG93.00 | Foreign body in penis                                     |
| 7C25D00 | Removal of constricting object from penis                    | 7D16012 | Williams construction of vagina                           |

|         |                                                          |         |                                                            |
|---------|----------------------------------------------------------|---------|------------------------------------------------------------|
| 7B37100 | Open biopsy of prostate                                  | 7B3Cz00 | Other operation on outlet of male bladder or prostate NOS  |
| K22y200 | Stricture of prostate                                    | 7B3E000 | High intensity focused ultrasound of prostate              |
| 7C02100 | Bilateral total orchidectomy, unspecified method         | 7C05.00 | Bilateral orchidopexy                                      |
| S880.00 | Open wound of penis                                      | 7B3BB00 | Endoscopic microwave destruction of lesion of prostate     |
| 7C23.00 | Prosthesis of penis                                      | 7B39.00 | Endoscopic resection of outlet of male bladder or prostate |
| 9N11.00 | Seen in prostate clinic                                  | ZV10415 | [V]Personal history of malignant neoplasm of prostate      |
| 7C22300 | Frenuloplasty of penis                                   | 7B3Ez00 | Other operations on prostate NOS                           |
| 85C3.11 | Prostate injection                                       | 5B51.00 | Microwave therapy to prostate                              |
| 25Q2.11 | Prostate enlarged on PR                                  | 7C03400 | Unilateral scrotal orchidectomy                            |
| 7C21200 | Other destruction of lesion of penis                     | S880000 | Degloving injury penis                                     |
| PCy1400 | Aplasia of penis                                         | PCyy000 | Hooded penis                                               |
| SD14A00 | Insect bite, nonvenomous, of penis                       | 7C06y00 | Other specified unilateral orchidopexy                     |
| 7B3By00 | Other therapeutic endoscopic operation on prostate OS    | SD13A00 | Blister of penis, infected                                 |
| 7C25.00 | Other operations on penis                                | SD17A00 | Splinter of penis without major open wound, infected       |
| 7B3B900 | Endoscopic transurethral electrovaporisation of prostate | 1J08.00 | Suspected prostate cancer                                  |
| 7B39.12 | Endoscopic prostatectomy                                 | 7B36100 | Retropubic prostatectomy                                   |
| 7C03200 | Unilateral total orchidectomy - unspecified              | K20..14 | Enlarged prostate - benign                                 |
| 7C21.00 | Extirpation of lesion of penis                           | 7B36300 | Perineal prostatectomy                                     |
| 7C03211 | Orchidectomy NEC                                         | 7B39000 | Transurethral prostatectomy                                |
| 7C05111 | Bevan bilateral orchidopexy                              | K224.00 | Amyloid of prostate                                        |
| 7B3B100 | Other endoscopic destruction of lesion of prostate       | 7B36.00 | Open prostatectomy                                         |
| 66Z0.00 | Prostate specific antigen threshold for referral         | Kyu6400 | [X]Other specified disorders of penis                      |
| 4M01.00 | Gleason prostate grade 5-7 (medium)                      | 7C03000 | Unilateral subcapsular orchidectomy                        |
| 25QA.00 | O/E - PR - prostate median sulcus preserved              | 7B3z.00 | Bladder neck and prostate operations NOS                   |
| K223.00 | Dysplasia of prostate                                    | B46..00 | Malignant neoplasm of prostate                             |
| B7C2200 | Myoma of prostate                                        | A541300 | Herpetic infection of penis                                |
| 8AD0.00 | Active surveillance of prostate cancer                   | K220.11 | Stone of prostate                                          |
| K22y.00 | Other disorders of prostate OS                           | 7C22.00 | Plastic operations on penis                                |
| 7B3C800 | Transrectal microwave thermotherapy to prostate          | PCy1000 | Congenital aplasia of prostate                             |

|         |                                                              |         |                                                            |
|---------|--------------------------------------------------------------|---------|------------------------------------------------------------|
| 7B3E100 | Implantation of radioactive substance into prostate          | PC50.00 | Cryptorchidism                                             |
| 7C21z00 | Extirpation of lesion of penis NOS                           | 7B3C500 | Transurethral biopsy prostate                              |
| 7C02300 | Bilateral scrotal orchidectomy                               | 26J0.11 | O/E - Clapper-bell testicle                                |
| B7C1100 | Benign neoplasm of glans penis                               | PCy0100 | Congenital absence of prostate                             |
| K21..11 | Prostatitis and other inflammatory diseases of prostate      | PCy7.00 | Congenital lateral curvature of penis                      |
| K22y100 | Infarction of prostate                                       | K27..00 | Disorders of penis                                         |
| 7C2..12 | Penis operations                                             | 7C2y.00 | Other specified operations on penis or other male organ    |
| 7C21100 | Cauterisation of lesion of penis                             | 7B36500 | Radical prostatectomy without pelvic node excision         |
| K27y200 | Atrophy of penis                                             | K20..13 | Benign myoma of prostate                                   |
| K274.12 | Induratio penis plastica                                     | 7B3Dy00 | OS endoscopic insertion of prosthesis into prostate        |
| 7B3BA00 | Endoscopic transurethral microwave thermotherapy to prostate | 43Z2000 | Prostate specific antigen normal                           |
| SD10A00 | Abrasion, penis                                              | 7C02200 | Bilateral inguinal orchidectomy                            |
| K20..11 | Benign adenoma of prostate                                   | K21..00 | Prostate inflammatory diseases                             |
| 14N8.00 | H/O: orchidectomy                                            | K270.12 | Leucoplakia of penis                                       |
| 7B3E.00 | Other operations on prostate                                 | K275.00 | Vascular disorders of penis                                |
| 7B2A100 | Unspec diagnostic cystoscopic exam bladder & biopsy prostate | B7C2.00 | Benign neoplasm of prostate                                |
| Kyu6800 | [X]Disorders of prostate in diseases classified elsewhere    | 7B39300 | Endoscopic laser ablation of prostate                      |
| K22yz00 | Other prostate disorders NOS                                 | B7C2100 | Fibroma of prostate                                        |
| 43ZC000 | Serum free:total prostate specific antigen ratio             | 7C03300 | Unilateral inguinal orchidectomy                           |
| 2661.00 | O/E - penis normal                                           | 2656.00 | O/E - testicles normal                                     |
| 9OkD100 | Prostate specific antigen monitoring second letter           | 7B36.11 | Open excision prostate                                     |
| 7B37.00 | Other open operations on prostate                            | A165000 | Tuberculosis of prostate                                   |
| 7B3Dz00 | Endoscopic insertion of prosthesis into prostate NOS         | 7B36z00 | Open excision of prostate NOS                              |
| 26J..00 | O/E - testicle                                               | SD1yA00 | Superficial injury of penis NOS, without major open wound  |
| 7B3C900 | Seed implantation into prostate                              | 7N51611 | [SO]Skin of penis                                          |
| 1A5B.00 | Pain in penis                                                | Pyu6900 | [X]Oth cong malform vas def/epidid/semin vesicles/prostate |
| Pyu6A00 | [X]Other congenital malformations of penis                   | B915.00 | Neoplasm of uncertain behaviour of prostate                |
| 7C25z00 | Other operation on penis NOS                                 | 7B3B000 | Endoscopic cryotherapy of prostate                         |

|         |                                                         |         |                                                              |
|---------|---------------------------------------------------------|---------|--------------------------------------------------------------|
| PC5z.00 | Undescended testicle NOS                                | 7C21y00 | Other specified extirpation of lesion of penis               |
| B482.00 | Malignant neoplasm of body of penis                     | ZX1L300 | Self-mutilation of penis                                     |
| PCy1200 | Congenital aplasia of testicle                          | 7C22z00 | Plastic operation on penis NOS                               |
| 7B36y00 | Other specified open excision of prostate               | 7C06100 | One stage unilateral orchidopexy                             |
| 38GT700 | QCancer prostate cancer risk                            | 43Z2100 | Prostate specific antigen abnormal                           |
| 7B39800 | Endoscopic excision of prostate using holmium laser     | 7C22y00 | Other specified plastic operation on penis                   |
| 7B3C400 | Balloon dilation of prostate                            | SF10000 | Crush injury, penis                                          |
| 7B39.13 | Endoscopic resection of prostate                        | K270.11 | Kraurosis of penis                                           |
| S881.00 | Open wound of penis with complication                   | Kyu6300 | [X]Other inflammatory disorders of penis                     |
| 7C02z00 | Bilateral orchidectomy NOS                              | B7C1z00 | Benign neoplasm of penis NOS                                 |
| 2658.00 | O/E - testicles small                                   | 124H.00 | Family history of prostate cancer                            |
| 7C21400 | Extracorporeal shockwave lithotripsy to lesion of penis | 7C05112 | Ombredanne bilateral orchidopexy                             |
| 7D16000 | Construction of vagina                                  | 9OkD.00 | Prostate specific antigen monitoring invitation              |
| 7B3C100 | Transperineal needle biopsy of prostate                 | 7C2z.00 | Penis and other male organ operations NOS                    |
| 7C22200 | Nesbitt's operation on penis                            | Kyu6100 | [X]Other specified disorders of prostate                     |
| 7B37z00 | Other open operation on prostate NOS                    | Kyu6000 | [X]Other inflammatory diseases of prostate                   |
| 7C22211 | Plication of corpora of penis                           | 7B3B111 | Endoscopic destruction of lesion of prostate NEC             |
| 7B36400 | Transvesical two stage prostatectomy                    | 7C25300 | Suture of penis                                              |
| 7A54C00 | PAE - prostate artery embolisation                      | B487.00 | Malignant neoplasm, overlapping lesion of penis              |
| 4L4J.00 | Urine prostate cancer antigen 3 targeted genetic test   | A32y500 | Diphtheria of penis                                          |
| 7B3CB00 | Radioactive seed implantation into prostate             | B48z.00 | Malignant neoplasm of penis and other male genital organ NOS |
| 7C05000 | Bilateral microvascular orchidopexy                     | 7B3y.00 | Other specified operations on bladder neck or prostate       |
| 7B3.00  | Bladder outlet and prostate operations                  | 7C06.00 | Unilateral orchidopexy                                       |
| 4M00.00 | Gleason prostate grade 2-4 (low)                        | SE24100 | Contusion, penis                                             |
| 7C20z00 | Amputation of penis NOS                                 | 7C22800 | Repair of fracture of penis                                  |
| 7C25200 | Other incision of penis                                 | B58y500 | Secondary malignant neoplasm of prostate                     |
| 7C25100 | Drainage of penis-unspecified                           | 7C05300 | Second stage bilateral orchidopexy                           |
| 9OkD200 | Prostate specific antigen monitoring third letter       | SD1zA00 | Superficial injury of penis NOS, infected                    |
| 7B3A400 | Transurethral incision of prostate                      | 7C06z00 | Unilateral orchidopexy NOS                                   |
| PCyx.00 | Other congenital anomaly of vas deferens or prostate    | K27y500 | Chronic ulcer of penis                                       |

|         |                                                            |         |                                                           |
|---------|------------------------------------------------------------|---------|-----------------------------------------------------------|
| 7B3C600 | Cryotherapy to prostate via perineal probe                 | 43Z2.11 | PSA - Serum prostate specific antigen level               |
| 7C2..11 | Penis & other male organ op                                | S77v200 | Prostate injury without mention of open wound into cavity |
| 8L51.00 | Prostatectomy planned                                      | 7C06111 | Ombredanne unilateral orchidopexy                         |
| 7B39700 | Endoscopic resection of prostate using vapotrode           | K220.00 | Calculus of prostate                                      |
| 7B3C111 | Trucut transperineal biopsy of prostate                    | 7B3B300 | Endoscopic punch biopsy of prostate                       |
| 7B3D.00 | Endoscopic insertion of prosthesis into prostate           | B7C1000 | Benign neoplasm of prepuce of penis                       |
| 7B3B.00 | Other therapeutic endoscopic operations on prostate        | 7C06200 | First stage unilateral orchidopexy                        |
| 7C21000 | Excision of lesion of penis                                | 1427000 | H/O: prostate cancer                                      |
| 7C27100 | Dermatological non-operative interventions involving penis | 7N51100 | [SO]Prostate                                              |
| PC5z.12 | Maldescent of testicle                                     | 7B3C011 | Franzen needle aspiratation of prostate                   |
| 266..00 | O/E - penis                                                | 2663.11 | O/E - discharge - penis                                   |
| SD12A00 | Blister of penis                                           | 7N51600 | [SO]Penis                                                 |
| S77w200 | Prostate injury with open wound into cavity                | K272300 | Cellulitis of penis                                       |
| 8HTz.00 | Referral to prostate assessment clinic                     | 7C25F00 | Operations on penis for erectile dysfunction NEC          |
| K270.00 | Leukoplakia of penis                                       | PC50z00 | Cryptorchidism NOS                                        |
| 43ZG.00 | Ultra-sensitive prostate specific antigen level            | 25Q8.00 | O/E - PR - prostate tender                                |
| 7B3Ey00 | Other specified other operations on prostate               | B58y700 | Secondary malignant neoplasm of penis                     |
| K22..00 | Other disorders of prostate                                | PC50100 | Cryptorchidism, bilateral                                 |
| 7B39200 | Other endoscopic resection of prostate                     | 7C02.00 | Bilateral orchidectomy                                    |
| 7B3B012 | Thermex thermotherapy of prostate                          | B7C2000 | Adenoma of prostate                                       |
| PCy2000 | Hypoplasia of penis                                        | 7B3C200 | Transrectal needle biopsy of prostate                     |
| 7B3C700 | Transurethral microwave thermotherapy to prostate          | 58D4.00 | Transrectal ultrasound scan of prostate                   |
| 7B3B600 | Ultrasound ablation of prostate                            | 4M0..00 | Gleason grading of prostate cancer                        |
| 7C20.00 | Amputation of penis                                        | 43Z2200 | Serum prostate specific antigen level                     |
| 7C20100 | Partial amputation of penis                                | 7B3B011 | Endoscopic cryotherapy to lesion of prostate              |
| 7B3C000 | Needle aspiration of prostate                              | 26J0.00 | O/E - Bell-clapper deformity of testicle                  |
| B835.00 | Carcinoma in situ of penis                                 | 7C02y00 | Other specified bilateral orchidectomy                    |
| 7C20y00 | Other specified amputation of penis                        | K20..12 | Benign fibroma of prostate                                |
| 7B3B200 | Endoscopic drainage of prostate                            | 7C05200 | First stage bilateral orchidopexy                         |
| 7B36200 | Transvesical prostatectomy                                 | 43ZC.00 | Free:total prostate specific antigen ratio                |

|         |                                                              |         |                                |
|---------|--------------------------------------------------------------|---------|--------------------------------|
| 7C02311 | Bilateral total scrotal orchidectomy                         | 7C25000 | Biopsy of penis                |
| 25Q9.00 | O/E - PR - Prostate median sulcus not preserved              | G82z111 | Penis vein thrombosis          |
| B48..00 | Malignant neoplasm of penis and other male genital organs    | 7D16011 | McIndoe construction of vagina |
| B834.00 | Carcinoma in situ of prostate                                |         |                                |
| 7C23y00 | Other specified prosthesis of penis                          |         |                                |
| 266Z.00 | O/E - penis NOS                                              |         |                                |
| 265C.00 | Examination of testicle                                      |         |                                |
| 43Z2.00 | Prostate specific antigen                                    |         |                                |
| 8BAV000 | Prostate cancer care review                                  |         |                                |
| 7B3Bz00 | Other therapeutic endoscopic operation on prostate NOS       |         |                                |
| 7B36411 | Freyer two stage transvesical prostatectomy                  |         |                                |
| 7B36000 | Radical prostatectomy - unspecified excision of pelvic nodes |         |                                |
| SD16A00 | Splinter of penis, without major open wound                  |         |                                |
| 7C06300 | Second stage unilateral orchidopexy                          |         |                                |
| 7C25500 | Injection of therapeutic substance into penis                |         |                                |
| PCyyz00 | Other congenital anomaly of penis NOS                        |         |                                |
| 7B3C.11 | Other operations on prostate                                 |         |                                |
| 7C05z11 | Bilateral orchidopexy NOS                                    |         |                                |
| K212.00 | Abscess of prostate                                          |         |                                |
| 1A57.00 | Pain in testicle                                             |         |                                |
| 388o.00 | International prostate symptom score                         |         |                                |
| 7B39600 | Endoscopic resection of prostate using laser                 |         |                                |
| K222.00 | Atrophy of prostate                                          |         |                                |

**Supplementary table 3: list of Read codes taken to indicate patient was likely assigned female at birth.**

|         |                                                              |         |                                                              |
|---------|--------------------------------------------------------------|---------|--------------------------------------------------------------|
| L34y100 | Other vulval/perineal trauma during delivery- delivered      | K56y112 | BPV - Vaginal bleeding                                       |
| 7E20z00 | Partial excision of ovary NOS                                | 2699.00 | Uterine cervix transformation zone visualised                |
| 7D03311 | Cauterisation of vulval warts                                | K53y200 | Infarction of ovary                                          |
| PC4y900 | Congenital stenosis of vagina                                | K51y200 | Relaxation of vaginal outlet                                 |
| K56y000 | Cyst of vagina                                               | 7D19z00 | Repair of vault of vagina NOS                                |
| K587.00 | Contact bleeding of cervix                                   | 269..00 | O/E - vaginal speculum exam.                                 |
| 7D03400 | Implantation of radioactive substance into vulva             | 7E05y00 | Other specified vaginal excision of uterus                   |
| AB21111 | Vaginal thrush                                               | 7E20200 | Marsupialisation of lesion of ovary                          |
| 7D14z00 | Excision of band of vagina NOS                               | 7E08000 | Dilation cervix & vacuum aspirat products conception uterus  |
| K42y500 | Vulval vestibulitis                                          | 4K29100 | Cervical smear - borderline change in endocervical cells     |
| 9kF7.00 | Endocervical swab culture neg - enhanced services administra | R150.11 | [D]Cervical smear - nonspecific abnormality                  |
| SH74000 | Burn of the vagina                                           | L247.00 | Congenital/acquired abnormality vagina in preg/childb/puerp  |
| 7E2B.00 | Other operations on ovary                                    | K562z00 | Stricture or atresia of the vagina NOS                       |
| 7E16311 | Open ringing of fallopian tube NEC                           | 7N60z00 | [SO]Vagina NEC                                               |
| SD15D00 | Insect bite, nonvenomous, of vagina, infected                | PC4yz00 | Other cervical/vaginal/external female genital anomaly NOS   |
| L345100 | Vulval and perineal haematoma during delivery - delivered    | 7E13.00 | Partial excision of fallopian tube                           |
| PC1y200 | Atresia of fallopian tube                                    | K424000 | Abscess of vulva                                             |
| 4K2..00 | Cervical smear result                                        | 4K39.00 | Cervical smear - gardnerella                                 |
| 7E16.00 | Other open occlusion of fallopian tube                       | K401200 | Chronic salpingo-oophoritis                                  |
| Pyu6100 | [X]Other congen malform of fallopian tube & broad ligament   | 7D17y00 | Repair of vaginal prolapse & amputation of cervix uteri OS   |
| PC4y700 | Agenesis of vulva                                            | 7E04312 | Hysterectomy NEC                                             |
| 4JKE.11 | Self taken low vaginal swab                                  | K53..00 | Noninflammatory disorders of the ovary/tube/broad ligament   |
| K564.00 | Old vaginal laceration                                       | PC4yw11 | Vaginal septum                                               |
| ZV13C00 | [V]Personal history of moderate cervical dysplasia           | K421600 | Vulvovaginitis in diseases EC                                |
| 7E00000 | Amputation of cervix uteri                                   | PCyB.00 | Doubling of vagina                                           |
| L411613 | Vulval varices in the puerperium                             | PC4yB11 | Imperforate vagina                                           |
| L341.13 | Vaginal muscle tear                                          | L411200 | VV's of perineum/vulva in pregnancy/puerperium -del+p/n comp |
| PC4yx00 | Other congenital anomaly of vulva                            | M181.11 | Pruritus vulvae                                              |



|         |                                                              |         |                                                              |
|---------|--------------------------------------------------------------|---------|--------------------------------------------------------------|
| 26A1.00 | O/E - no vaginal discharge                                   | 7B32y00 | Vaginal operation to support outlet of female bladder OS     |
| SD16D00 | Splinter of vagina, without major open wound                 | ByuFA00 | [X]Carcinoma in situ of other parts of cervix                |
| BBCE.00 | [M]Lipid cell tumour of ovary                                | R150z00 | [D]Nonspecific abnormal Papanicolaou cervical smear NOS      |
| 7E1Cz00 | Endoscopic bilateral occlusion of fallopian tubes NOS        | 7E15000 | Open bilateral ligation of fallopian tubes                   |
| 7D15y00 | Other specified extirpation of lesion of vagina              | B412.00 | Malignant neoplasm, overlapping lesion of cervix uteri       |
| B44..00 | Malignant neoplasm of ovary and other uterine adnexa         | 4JK3.00 | Low vaginal swab taken                                       |
| Kyu8300 | [X]Other specified inflammation of vagina and vulva          | 7E05y11 | Ward vaginal hysterectomy                                    |
| 4KK1.00 | Vaginal vault smear repeat at 12 months                      | 7D15.00 | Extirpation of lesion of vagina                              |
| 7E00y00 | Other specified excision of cervix uteri                     | L246312 | Stenosis of cervix complicating a/n care- baby not delivered |
| K288100 | Tunica vaginalis stricture                                   | K57y400 | Lesion of vulva                                              |
| 7E22100 | Suture of ovary                                              | K516000 | Congenital vaginal enterocele                                |
| 4JK4.00 | Vulval swab taken                                            | 685H.00 | No smear - benign hysterectomy                               |
| SD10C00 | Abrasion, vulva                                              | K577000 | Mild vulvar dysplasia                                        |
| 7D1y.00 | Other specified operations on vagina                         | K570100 | Leukoplakia of vulva                                         |
| AB21000 | Candidiasis of vulva                                         | K520600 | Vesicocervicovaginal fistula                                 |
| 7E04800 | Abdominal hysterectomy and left salpingoophorectomy          | 7E02.00 | Biopsy of cervix uteri                                       |
| K287.00 | Chylocele of tunica vaginalis                                | 7N60y00 | [SO]Specified vagina NEC                                     |
| K40..00 | Ovarian, fallopian tube and pelvic inflammatory diseases     | 7E18000 | Reconstruction of fallopian tube                             |
| K532100 | Theca lutein cyst of the ovary                               | K562100 | Post-radiation vaginal adhesions                             |
| 6853.00 | Ca cervix screen - not wanted                                | 7D1B.00 | Introduction of supporting pessary into vagina               |
| L247200 | Vaginal abnormality - baby delivered+postpartum complication | PC4yv00 | Other congenital anomaly of cervix                           |
| 7B26100 | Creation of vesicovaginal fistula                            | ZV10414 | [V]Personal history of malignant neoplasm of ovary           |
| Kyu9N00 | [X]Dysplasia of vulva, unspecified                           | 7D1A300 | Repair of uterovaginal fistula                               |
| SD14D00 | Insect bite, nonvenomous, of vagina                          | 7E15y00 | Other specified open bilateral occlusion of fallopian tubes  |
| 7N62200 | [SO]Ovary                                                    | M181.12 | Vulva sore                                                   |
| 7D1..00 | Vagina operations                                            | Kyu9L00 | [X]Severe vaginal dysplasia, not elsewhere classified        |
| 7D05200 | Evacuation of haematoma of vulva                             | 7E03311 | Cerclage of cervix of non-gravid uterus                      |
| 7E1Dy00 | Other specified endoscopic occlusion of fallopian tube       | B41y100 | Malignant neoplasm of squamocolumnar junction of cervix      |
| 7E23.00 | Other open operations on ovary                               | 7E2..12 | Ovary operations                                             |
| AB21.00 | Candidal vulvovaginitis                                      | Kyu9M00 | [X]Severe vulvar dysplasia, not elsewhere classified         |

|         |                                                            |         |                                                             |
|---------|------------------------------------------------------------|---------|-------------------------------------------------------------|
| AD10012 | Leukorrhoea vaginalis - trichomonal                        | 7E1z.00 | Fallopian tube operations NOS                               |
| B833900 | Vaginal intraepithelial neoplasia grade 3                  | A166.00 | Tuberculous oophoritis or salpingitis                       |
| 7E15z00 | Open bilateral occlusion of fallopian tubes NOS            | 685..12 | Cervical smear screen                                       |
| 1A5E.00 | Pain in vulva                                              | L411300 | VV's of perineum/vulva in pregnancy/puerperium + a/n comp   |
| K554100 | Contracture of cervix                                      | 7E01100 | Laser destruction of lesion of cervix uteri NEC             |
| 7E08500 | Dilation of cervix and extraction termination of pregnancy | K402300 | Oophoritis unspecified                                      |
| 7D05411 | Separation of vulval adhesions                             | L340.15 | Vulval tear                                                 |
| B790.11 | Adenomatous polyp - cervix uteri                           | 4K4C.00 | Cervical smear repeat at 60 months                          |
| 7D19700 | Repair of vault of vagina with mesh using vaginal approach | 7E03100 | Dilation of cervix uteri                                    |
| 7E03000 | Repair of cervix uteri NEC                                 | L247411 | Septate vagina complicating p/n care - baby delivered prev  |
| 7E21y00 | Other specified open destruction of lesion of ovary        | 124C.00 | FH: neoplasm of ovary                                       |
| K53y.00 | Other ovary, fallopian tube and broad ligament disorders   | PC4z.00 | Cervical, vaginal and external female genital anomaly NOS   |
| 7E19000 | Removal of products of conception from fallopian tube      | 7E19011 | Removal of ectopic pregnancy from fallopian tube            |
| K533000 | Acquired atrophy of the ovary unspecified                  | 7D04300 | Reconstruction of vulva with distant flap                   |
| K57yz00 | Other noninflammatory vulval and perineal disorder NOS     | L246.11 | Polyp of cervix in pregnancy, childbirth and the puerperium |
| 7E11400 | Unilateral oophorectomy NEC                                | SD1zC00 | Superficial injury of vulva NOS, infected                   |
| B833600 | Vulval intraepithel neop grd 3                             | K514.00 | Uterovaginal prolapse, unspecified                          |
| 7E11200 | Unilateral salpingectomy NEC                               | K551.12 | CIN I - II, cervical dysplasia                              |
| 7D11y00 | Other specified other operation on introitus of vagina     | 7E16700 | Open ligation of left fallopian tube                        |
| 4K27.00 | Cervical smear:atrophic change                             | 4K3A.00 | Cervical smear: koilocytosis                                |
| L248z00 | Vulval abnormality in pregnancy/childbirth/puerperium NOS  | K400z00 | Acute salpingitis and oophoritis NOS                        |
| B831100 | Carcinoma in situ of exocervix                             | 7E2A.13 | Other examination of vagina                                 |
| 4K2J.00 | Cervical smear - low grade dyskaryosis                     | K402000 | Fallopian tube abscess                                      |
| 7N61000 | [SO]Cervix uteri                                           | 7E1D.11 | Endoscopic unilateral occlusion of fallopian tubes          |
| 7E25400 | Endoscopic extirpation of lesion of ovary NEC              | 7D1A400 | Suture of vagina                                            |
| 7D15700 | Excision of granulation tissue of vagina                   | K520300 | Urethrovesicovaginal fistula                                |
| 2689.00 | O/E-VE-cervical excit.present                              | 4K36.00 | Cervical smear - wart virus                                 |
| 7E01.00 | Destruction of lesion of cervix uteri                      | 7D0..00 | Vulva and female perineum operations                        |
| K573.11 | Vulva hypertrophy NOS                                      | K554011 | Stenosis of cervix - acquired                               |
| 7E25000 | Endoscopic extirpation of lesion of ovary                  | 4K2N.00 | Cervical smear - ?endocervical type glandular neoplasia     |
| 9O8U.00 | Cervical smear slide broken in transit                     | 7E1B100 | Open biopsy of fallopian tube                               |

|         |                                                              |         |                                                             |
|---------|--------------------------------------------------------------|---------|-------------------------------------------------------------|
| K57y100 | Oedema of vulva                                              | 7E1B000 | Open freeing of adhesions of fallopian tube                 |
| S77w000 | Fallopian tube injury with open wound into cavity            | K511.00 | Uterine prolapse without vaginal wall prolapse              |
| 7E10100 | Bilateral salpingectomy NEC                                  | K516z00 | Vaginal enterocele NOS                                      |
| B833300 | Carcinoma in situ of vulva                                   | 7E10200 | Bilateral oophorectomy NEC                                  |
| 9O82.00 | Cervical smear - 2nd call                                    | K56y100 | Haemorrhage of vagina                                       |
| 7E04G00 | Total abdominal hysterectomy with conservation of ovaries    | B410z00 | Malignant neoplasm of endocervix NOS                        |
| 7E05400 | Laparoscopic vaginal hysterectomy                            | 8C85.00 | Gamete intrafallopian transfer                              |
| 6855.00 | Ca cervix screen - not needed                                | K554000 | Acquired stricture of cervix                                |
| B7B1.00 | Benign neoplasm of vagina                                    | K510z00 | Vaginal prolapse without uterine prolapse NOS               |
| 269Z.00 | O/E -vaginal speculum exam.NOS                               | K510400 | Vaginal prolapse unspecified without uterine prolapse       |
| B913100 | Neoplasm of uncertain behaviour of vulva                     | L247011 | Septate vagina affecting obstetric care                     |
| 4KK2.00 | Vaginal vault smear repeat at 18 months                      | K575.00 | Haematoma of vulva                                          |
| 142D.00 | H/O: malignant neoplasm vulva                                | Z174D00 | Saving clots passed via vagina                              |
| 7D14y00 | Other specified excision of band of vagina                   | L246212 | Stenosis of cervix - baby delivered+postpartum complication |
| 279Z.00 | O/E - VE - cervix dilat. NOS                                 | 7D18600 | Paravaginal repair                                          |
| SD16C00 | Splinter of vulva, without major open wound                  | 7D11z00 | Other operation on introitus of vagina NOS                  |
| 7E2y.00 | Other specified operations on ovary or broad ligament        | 7E10000 | Bilateral salpingoophorectomy                               |
| 7F06000 | Cerclage of cervix of gravid uterus                          | 6857.11 | Cervical smear non-responder                                |
| B7B0000 | Benign neoplasm of fallopian tube                            | B45y000 | Malignant neoplasm of overlapping lesion of vulva           |
| 2781.00 | O/E - VE - cervix not ripe                                   | Kyu9D00 | [X]Other specified abnormal uterine and vaginal bleeding    |
| 7E13z00 | Partial excision of fallopian tube NOS                       | 7E1D100 | Endoscopic occlusion of right fallopian tube                |
| L090400 | Salpingo-oophoritis following abortive pregnancy             | 4KAZ.00 | Vaginal vault smear NOS                                     |
| 7D1Dz00 | Other operation on vagina NOS                                | 7F1A000 | Caesarean hysterectomy                                      |
| 1A72.00 | Vaginal discharge present                                    | 7E04700 | Abdominal hysterectomy and right salpingoophorectomy        |
| 7F18000 | Manip cephalic vaginal deliv abnorm pres head without instrm | 685M.00 | Cervical smear overdue                                      |
| 7D1D600 | Insertion of pack into vagina NEC                            | 7B30y00 | Combined abdo & vaginal op to support outlet fem bladder OS |
| ZV13B00 | [V]Personal history of mild cervical dysplasia               | L34y000 | Other vulval/perineal trauma during delivery, unspecified   |
| 685R.00 | Liquid based cervical cytology screening                     | K53yz00 | Other ovary, fallopian tube and broad ligament disorder NOS |
| 4JK2200 | HVS culture - trichomonas vaginalis                          | 7E00300 | Endocervical excision NEC                                   |
| 124D.00 | FH: neoplasm of cervix                                       | K401100 | Chronic perioophoritis                                      |
| 7D1z.00 | Vagina operations NOS                                        | 7D05300 | Sclerosing injection into vulval vein                       |

|         |                                                              |         |                                                              |
|---------|--------------------------------------------------------------|---------|--------------------------------------------------------------|
| 158..12 | Vaginal bleeding                                             | KyuA100 | [X]Residual ovary syndrome                                   |
| 7D15500 | Excision of vaginal adhesions                                | K53y300 | Rupture of ovary                                             |
| 7E11000 | Unilateral salpingoophorectomy NEC                           | L247412 | Stenosis of vagina complicating p/n care - baby deliv prev   |
| 7E04511 | Abdominal hysterectomy & bilateral salpingoophorectomy (BSO) | 7E05311 | Heaney vaginal hysterectomy                                  |
| K535100 | Torsion of the ovary and fallopian tube                      | L411612 | Vaginal varices in the puerperium                            |
| 26AZ.00 | O/E - vaginal discharge NOS                                  | PC22.00 | Doubling of uterus, including cervix and vagina              |
| K534000 | Prolapse of the ovary                                        | K55y300 | Haemorrhage of cervix                                        |
| 7E2A300 | Vaginal vault smear                                          | 7E22.00 | Repair of ovary                                              |
| 7E16z00 | Other open occlusion of fallopian tube NOS                   | 7F22700 | Pack to control postnatal vaginal bleeding                   |
| L247112 | Stenosis of vagina - baby delivered                          | 7E04N00 | Radical hysterectomy with conservation of ovaries            |
| K551400 | Moderate cervical dysplasia                                  | 7E2A.11 | Other examination of cervix uteri                            |
| SD1yD00 | Superficial injury of vagina NOS, without major open wound   | 7E17000 | Reanastomosis of fallopian tube NEC                          |
| L248300 | Vulval abn complicating a/n care - baby not yet delivered    | SG92100 | Foreign body in vagina                                       |
| 7E18300 | Suture of fallopian tube NEC                                 | 7E25.00 | Therapeutic endoscopic operations on ovary                   |
| 2695.00 | Uterine cervix visualised                                    | 4JK2000 | High vaginal swab culture positive                           |
| 7D1Az00 | Other repair of vagina NOS                                   | 7E04.11 | Abdominal hysterectomy                                       |
| SD13C00 | Blister of vulva, infected                                   | 2645.00 | Vaginal mass                                                 |
| 7E18.00 | Other repair of fallopian tube                               | SH74z00 | Burn of the vagina or uterus NOS                             |
| 7D1A600 | Abdominal repair vesicovaginal fistula                       | 7E1H400 | Operation to ensure patency of fallopian tube NEC            |
| 7E00600 | Loop diathermy excision of cervix                            | 7N60.00 | [SO]Vagina                                                   |
| S77v100 | Ovary injury without mention of open wound into cavity       | 7E1G000 | Diagnost endoscop examination & biopsy lesion fallopian tube |
| 7E05.12 | Vaginal hysterectomy                                         | K535000 | Torsion of the ovary                                         |
| 7D1C000 | Evacuation of haematoma from vagina                          | 7D14400 | Excision of transverse vaginal septum vertical               |
| 1A58000 | Vaginal pain                                                 | A166z00 | Tuberculous oophoritis or salpingitis NOS                    |
| 7D04100 | Reconstruction of vulva with skin graft                      | 7E19.00 | Incision of fallopian tube                                   |
| 7D1C.00 | Exploration of vagina                                        | 7D1B600 | Insertion of ring pessary into vagina                        |
| 7E01500 | Colposcopic laser destruction of lesion of cervix            | 7D04200 | Reconstruction of vulva with local flap                      |
| 7D1By00 | Introduction of supporting pessary into vagina OS            | K424z00 | Other abscess of vulva NOS                                   |
| 7E23y00 | Other specified other open operation on ovary                | 1584.00 | Heavy episode of vaginal bleeding                            |
| 7E11100 | Salpingoophorectomy remaining solitary fallop tube and ovary | 7E05000 | Vaginal hysterocolpectomy and excision of periuterine tissue |

|         |                                                           |         |                                                              |
|---------|-----------------------------------------------------------|---------|--------------------------------------------------------------|
| 4149.00 | Cervical cytology sample sent to laboratory               | 7D1D500 | Colposcopic removal of foreign body from vagina              |
| B790.00 | Benign neoplasm of cervix uteri NEC                       | K402z00 | Unspecified salpingitis and oophoritis NOS                   |
| 7E22y00 | Other specified repair of ovary                           | L247z00 | Vaginal abnormality in pregnancy/childbirth/puerperium NOS   |
| 7E11300 | Salpingectomy of remaining solitary fallopian tube NEC    | 7D1A.00 | Other repair of vagina                                       |
| 7D1B300 | Change of vaginal pessary                                 | L398500 | Delivery by caesarean hysterectomy                           |
| 7D1B200 | Removal of supporting pessary from vagina                 | K560000 | Mild vaginal dysplasia                                       |
| 7F22711 | Pack to control postnatal vaginal bleeding                | 9O8T.00 | Cervical smear slide lost in transit                         |
| SD12D00 | Blister of vagina                                         | PC4yC00 | Congenital vaginal cyst NEC                                  |
| L246z12 | Stenosis of cervix in pregnancy/childbirth/puerperium NOS | PC1y000 | Congenital absence of fallopian tube                         |
| 685B.00 | Ca cervix screen normal                                   | L340.14 | Vaginal tear                                                 |
| 7D1B000 | Insertion of Hodge pessary into vagina                    | 685C.00 | Ca cervix screen abnormal                                    |
| B913000 | Neoplasm of uncertain behaviour of vagina                 | SG92.00 | Foreign body in vulva and vagina                             |
| L340600 | Vaginal tear during delivery                              | K551X00 | Severe cervical dysplasia, not elsewhere classified          |
| 4J17000 | High vaginal swab culture                                 | 7E0H000 | Connection of uterus to vagina                               |
| 7F06011 | McDonald cerclage of cervix                               | 7D1C300 | Colposcopy of vagina                                         |
| 7E14z00 | Placement of prosthesis in fallopian tube NOS             | A541100 | Herpetic vulvovaginitis                                      |
| 7E02500 | Diathermy loop cone biopsy of cervix                      | 4JKE.00 | Low vaginal swab taken by patient                            |
| 6856.00 | Ca cervix screen - up to date                             | 7E26000 | Diagnostic endoscopic examination and biopsy lesion of ovary |
| B440.00 | Malignant neoplasm of ovary                               | 7D15000 | Excision of lesion of vagina                                 |
| L353100 | Obstetric laceration of cervix - delivered                | K551200 | Squamous metaplasia of cervix                                |
| 4K29000 | Cervical smear - borderline change in squamous cells      | 4KK3.00 | Vaginal vault smear repeat at 24 months                      |
| 7B32.00 | Vaginal operations to support outlet of female bladder    | 7E1y.00 | Other specified operations on fallopian tube                 |
| PC0..00 | Anomalies of ovaries                                      | L246412 | Stenosis of cervix complicating p/n care - baby deliv prev   |
| 7E20000 | Excision of wedge of ovary                                | 7E12400 | Left oophorectomy NEC                                        |
| K557.11 | Polyp of cervix NOS                                       | 7E1F200 | Endoscopic intrafallopian transfer of gamete                 |
| 6854.00 | Ca cervix screen - wanted                                 | 7E01y00 | Other specified destruction of lesion of cervix uteri        |
| R150000 | [D]Dyskaryotic cervical smear                             | 4K31.00 | Cervical smear-no inflammation                               |
| 7D03.00 | Extirpation of lesion of vulva                            | 7D15800 | Excision of vaginal polyp                                    |
| K400000 | Acute oophoritis                                          | K552.00 | Leukoplakia of cervix                                        |
| 4K2P.00 | Cervical smear - ?non-cervical type glandular neoplasia   | K28yw00 | Other tunica vaginalis disease                               |
| 685D.00 | Ca cervix screen + fee claim                              | 7D1A100 | Repair of urethrovaginal fistula                             |

|         |                                                              |         |                                                              |
|---------|--------------------------------------------------------------|---------|--------------------------------------------------------------|
| ZV26211 | [V]Fallopian tube insufflation                               | 7D15600 | Insertion of vaginal caesium applicators                     |
| K402500 | Salpingo-oophoritis unspecified                              | 7E16200 | Open clipping of remaining solitary fallopian tube           |
| K521400 | Sigmoidovaginal fistula                                      | AB21100 | Candidiasis of vagina                                        |
| 4K2D.00 | Cervical smear transformation zone cells present             | 7E07000 | Dilation cervix uteri & curettage products conception uterus |
| 7D04500 | Deinfibulation of vulva                                      | K535.00 | Torsion of the ovary, ovarian pedicle or fallopian tube      |
| L39y412 | Vaginal discomfort postnatal                                 | L345200 | Vulval and perineal haematoma during delivery + p/n problem  |
| AB21z00 | Candidal vulvovaginitis NOS                                  | 1ABH.11 | Vaginal penetration                                          |
| L247.13 | Vaginal abnormality in pregnancy/childbirth/puerperium       | K553000 | Old laceration of cervix unspecified                         |
| 7E29100 | Transvaginal drainage of ovarian cyst                        | B58y411 | Secondary cancer of the vulva                                |
| 7E1Hz00 | Other operation on fallopian tube NOS                        | L345.12 | Vulval and perineal haematoma during delivery                |
| PC11000 | Epooophoron cyst                                             | 7E02y00 | Other specified biopsy of cervix uteri                       |
| 7E03z00 | Other operation on cervix uteri NOS                          | K5B5000 | Primary vaginal infertility                                  |
| 9O8i.00 | Annual cervical smear required                               | L345.00 | Vulval and perineal haematoma during delivery                |
| 7D18.00 | Other repair of vaginal prolapse                             | 7N60400 | [SO]Introitus of vagina                                      |
| K510.00 | Vaginal wall prolapse without uterine prolapse               | S886.00 | Open wound of vagina                                         |
| L247300 | Vaginal abnormality complicating a/n care-baby not delivered | L245.00 | Cervical incompetence                                        |
| N330600 | Postoophorectomy osteoporosis                                | Z181400 | Chaperoning during vaginal examination                       |
| PC4y400 | Congenital absence of vagina                                 | 7E02z00 | Biopsy of cervix uteri NOS                                   |
| SF10200 | Crush injury, vulva                                          | L031100 | Gravid fallopian tube rupture                                |
| 7E12000 | Salpingoophorectomy NEC                                      | K504000 | Endometriosis of the rectovaginal septum                     |
| 4K26.00 | Cervical smear: ? gland neopl.                               | A980200 | Acute gonococcal vulvovaginitis                              |
| PC4y.00 | Other cervical, vaginal and external female genital anomaly  | 268A.00 | O/E-VE-cervical excit.absent                                 |
| 2698.00 | Lesion of cervix                                             | PC41200 | Congenital cyst of vulva                                     |
| 7D05z00 | Other operation on vulva NOS                                 | 12FA.00 | FH: Polycystic ovaries                                       |
| 142G.00 | H/O: malignant neoplasm ovary                                | SD15C00 | Insect bite, nonvenomous, of vulva, infected                 |
| K504.00 | Endometriosis of the rectovaginal septum and vagina          | 7E1Gz11 | Laparoscopy of fallopian tube NEC                            |
| 7H10200 | Ligation of patent processus vaginalis                       | 7E04A00 | Abdominal hysterectomy with conservation of ovaries          |
| SG92z00 | Foreign body in vulva and vagina NOS                         | A982200 | Chronic gonococcal vulvovaginitis                            |
| 7E23500 | Oophorotomy and rupture of cyst                              | K533200 | Acquired atrophy of the fallopian tube                       |
| B450z00 | Malignant neoplasm of vagina NOS                             | G856.00 | Vulval varices - non obstetric                               |
| 7E02400 | Ring biopsy of cervix uteri                                  | K57y000 | Cyst of vulva                                                |

|         |                                                             |         |                                                            |
|---------|-------------------------------------------------------------|---------|------------------------------------------------------------|
| 685J.00 | Vaginal vault smear due                                     | B833700 | Vaginal intraepithelial neoplasia grade 1                  |
| 7D13.00 | Other obliteration of vagina                                | 7E25y00 | Other specified therapeutic endoscopic operations on ovary |
| K55y100 | Cyst of cervix                                              | S779.00 | Injury of ovary                                            |
| 7D19100 | Repair of vault of vagina using abdominal approach NEC      | PC41.00 | Embryonic cyst of cervix/vagina/external female genitalia  |
| 7D16700 | Vaginoplasty in presence of uterus for absent vagina        | 7E16511 | Open ringing of left fallopian tube                        |
| 4JK2500 | High vaginal swab: white cells seen                         | 1599.00 | H/O: hysterectomy                                          |
| 7E01211 | Diathermy of lesion of cervix uteri                         | 4K2F.00 | Cervical smear pus cells present                           |
| 7E04100 | Abdominal hysterectomy & excision of periuterine tissue NEC | 4K3..00 | Cervical smear - inflam.change                             |
| 7F23000 | Immed repair obstetric laceration of uterus or cervix uteri | 7E05800 | Vaginal hysterectomy and left salpingo-oophorectomy        |
| 7D18y00 | Other specified other repair of vaginal prolapse            | K400600 | Subacute perioophoritis                                    |
| K424.00 | Other abscess of vulva                                      | K571.00 | Atrophy of vulva                                           |
| 7D05100 | Drainage of lesion of vulva                                 | 7E11700 | Left salpingoophorectomy                                   |
| 7E26z00 | Diagnostic endoscopic examination of ovary NOS              | K533312 | Fallopian tube absent acquired                             |
| 7D03100 | Laser destruction of lesion of vulva                        | 7F19000 | Manually assisted vaginal delivery                         |
| 7B32400 | Partial removal of tension-free vaginal tape                | K570.00 | Dystrophy of vulva                                         |
| 7F1B400 | Incision of cervix to facilitate delivery                   | 7E14y00 | Other specified placement of prosthesis in fallopian tube  |
| K534.00 | Prolapse of the ovary and fallopian tube                    | K56z.00 | Noninflammatory vaginal disorder NOS                       |
| 7D18500 | Anterior mesh vaginal repair                                | 7D1B400 | Removal of ring pessary from vagina                        |
| Pyu6500 | [X]Other congenital malformations of vulva                  | 7E00z00 | Excision of cervix uteri NOS                               |
| 8C81.13 | Gamete intrafallopian transfer                              | L354200 | Obstetric high vaginal laceration with postnatal problem   |
| 7B32100 | Introduction of biethium bean through vagina                | K5B5z00 | Female infertility of vaginal origin NOS                   |
| 7E20.11 | Partial oophorectomy                                        | 7E05200 | Vaginal hysterocolpectomy NEC                              |
| 9kF7.11 | Endocervical swab culture neg                               | K521600 | Fistula of vagina to small intestine                       |
| 7E02600 | Loop diathermy biopsy of cervix uteri                       | 4K2C.00 | Smear NAD - no endocervical cells                          |
| 685..11 | Cervical cytology screen                                    | SE24300 | Contusion, vulva                                           |
| 9O8X.00 | Cervical smear - suspend recall                             | 7E1B.00 | Other open operations on fallopian tube                    |
| L34y200 | Other vulval/perineal trauma during delivery + p/n problem  | R150100 | [D] Koilocytosis - cervical smear                          |
| 7D12y00 | Other specified excision of vagina                          | K534z00 | Ovarian and fallopian tube prolapse NOS                    |
| L248.13 | Vulval abnormality in pregnancy/childbirth/puerperium       | 4KK..00 | Vaginal vault smear action needed                          |
| 7D14300 | Excision of transverse vaginal septum low                   | K551000 | Anaplasia of cervix                                        |
| K521700 | Fistula of vagina to large intestine                        | S887.00 | Open wound of vagina with complication                     |



|         |                                                            |         |                                                              |
|---------|------------------------------------------------------------|---------|--------------------------------------------------------------|
| B7B2z00 | Benign neoplasm of vulva NOS                               | SG92000 | Foreign body in vulva                                        |
| 9O83.00 | Cervical smear - 3rd call                                  | 7B35y11 | Spence vaginal urethrocystostomy                             |
| Z257.12 | Spontaneous vaginal delivery                               | 9O86.00 | Cervical smear - 2nd recall                                  |
| 6859.11 | Cervical cytology examination                              | K56y200 | Granulation tissue at vaginal vault                          |
| 7E2By00 | Other specified other operations on ovary                  | 7F17200 | Vacuum delivery before full dilation of cervix               |
| 7D02y00 | Other specified excision of vulva                          | 7D0..12 | Vulva operations                                             |
| L247111 | Septate vagina - baby delivered                            | 7E23100 | Open freeing of adhesions of ovary                           |
| 7D1D200 | Biopsy of lesion of vagina                                 | 7D02400 | Marsupialisation of lesion of vulva                          |
| 9O85.00 | Cervical smear - 1st recall                                | Kyu9600 | [X]Oth noninflam disorders/ovary,fallopian tbe+broad ligamnt |
| 7E25300 | Endoscopic drilling of ovary                               | 7D19000 | Repair vaginal vault combined abdominal & vaginal approach   |
| L245000 | Cervical incompetence unspecified                          | 7E16300 | Open clipping of fallopian tube NEC                          |
| 7D02.00 | Excision of vulva                                          | K562400 | Stenosis of vagina                                           |
| 7E01200 | Cauterisation of lesion of cervix uteri                    | A541200 | Herpetic ulceration of vulva                                 |
| Pyu6300 | [X]Other congenital malformations of uterus and cervix     | 7E15100 | Open bilateral clipping of fallopian tubes                   |
| 7E1Cy00 | Endoscopic bilateral occlusion of fallopian tubes OS       | 7D12z00 | Excision of vagina NOS                                       |
| K425100 | Ulceration of vulva in diseases EC                         | SD11C00 | Abrasion of vulva, infected                                  |
| 7E16400 | Open clipping of right fallopian tube                      | 7D19600 | Repair of vault of vagina with mesh using abdominal approach |
| K533313 | Absent ovary, acquired                                     | K562.12 | Atresia of vagina                                            |
| K551100 | Epidermidization of cervix                                 | 7E01000 | Avulsion of lesion of cervix uteri                           |
| K520200 | Urethrovaginal fistula                                     | PC4yD00 | Fusion of vulva                                              |
| L34z.00 | Vulval/perineal trauma during delivery NOS                 | K561.00 | Leukoplakia of vagina                                        |
| 7E2z.00 | Ovary and broad ligament operations NOS                    | 7E16600 | Open ligation of right fallopian tube                        |
| L247.11 | Septate vagina in pregnancy, childbirth and the puerperium | 7E16y00 | Other specified other open occlusion of fallopian tube       |
| PC11z00 | Embryonic cyst of fallopian tube or broad ligament NOS     | B58y200 | Secondary malignant neoplasm of cervix uteri                 |
| B41yz00 | Malignant neoplasm of other site of cervix NOS             | 4K2L.00 | Cervical smear - high grade dyskaryosis (severe)             |
| 7E03011 | Lash repair of internal os of cervix                       | K556.00 | Hypertrophic elongation of the cervix                        |
| 7D17000 | Ant and post colporrhaphy and amputation of cervix uteri   | 4KA..00 | Vaginal vault smear result                                   |
| 7E20100 | Excision of lesion of ovary                                | L411.12 | Vulval obstetric varicose veins                              |
| 7D17.00 | Repair of vaginal prolapse and amputation of cervix uteri  | B833100 | Carcinoma in situ of fallopian tube                          |
| 7E23z00 | Other open operation on ovary NOS                          | K562300 | Atresia of vagina                                            |
| K5B5100 | Secondary vaginal infertility                              | 4JRL.00 | Cervical cytology screening test                             |



|         |                                                                                                                             |         |                                                              |
|---------|-----------------------------------------------------------------------------------------------------------------------------|---------|--------------------------------------------------------------|
| ZV10411 | [V]Personal history of malignant neoplasm of cervix uteri                                                                   | K42y200 | Ulcer of vagina                                              |
| K550.00 | Erosion and ectropion of the cervix                                                                                         | L247311 | Septate vagina complicating a/n care- baby not yet delivered |
| 268..11 | O.E - vaginal exam.- non obst.                                                                                              | PC4y500 | Agensis of vagina                                            |
| 7D1D400 | Dilation of vagina                                                                                                          | SD11D00 | Abrasion of vagina, infected                                 |
| 7E2B000 | Transvaginal ultrasound guided aspiration of ovarian cyst                                                                   | K520700 | Vesicovaginal fistula                                        |
| S884.00 | Open wound of vulva                                                                                                         | 7D04y00 | Other specified repair of vulva                              |
| 7E08900 | Vaginal removal of uterine foreign body                                                                                     | 7E01700 | Loop diathermy of cervix                                     |
| BB2N.00 | [M]Intraepit neop,grade III,of cervix, vulva and vagina<br>Subtotl abdominal hysterectomy & right salpingo-<br>oophorectomy | PC11.00 | Embryonic cyst of fallopian tube and broad ligament          |
| 7E04J00 |                                                                                                                             | L353z00 | Obstetric laceration of cervix NOS                           |
| 7D1Cz00 | Exploration of vagina NOS                                                                                                   | L353200 | Obstetric laceration of cervix with postnatal problem        |
| 4K21.00 | Cervical smear:inadequate spec                                                                                              | 7E03500 | Colposcopic biopsy cervix                                    |
| 7D18z00 | Other repair of vaginal prolapse NOS                                                                                        | 7D12.00 | Excision of vagina                                           |
| 7D1A200 | Repair of rectovaginal fistula                                                                                              | 4JK9.00 | Endocervical chlamydia swab                                  |
| 685I.00 | No smear-amputation of cervix                                                                                               | S885.00 | Open wound of vulva with complication                        |
| 62O6.00 | Vaginal "show"                                                                                                              | 7E0Gz00 | Other vaginal operation on uterus NOS                        |
| B41z.00 | Malignant neoplasm of cervix uteri NOS                                                                                      | L353.12 | Tear of cervix - obstetric                                   |
| B7A2.00 | Benign teratoma of ovary                                                                                                    | B7B0z00 | Benign neoplasm of fallopian tube or uterine ligament NOS    |
| B41y.00 | Malignant neoplasm of other site of cervix                                                                                  | B41..00 | Malignant neoplasm of cervix uteri                           |
| 8L70.00 | Hysterectomy planned                                                                                                        | K501.11 | Chocolate cyst of ovary                                      |
| L411.00 | VV's of perineum/vulva in pregnancy/puerperium                                                                              | L353.00 | Obstetric laceration of cervix                               |
| SD10D00 | Abrasion, vagina                                                                                                            | K400500 | Subacute oophoritis                                          |
| AB21.11 | Monilial vulvovaginitis                                                                                                     | 4JK2.00 | High vaginal swab taken                                      |
| 7E22300 | Fixation of ovary NEC                                                                                                       | 7D1D300 | Removal of foreign body from vagina                          |
| 4K2G.00 | Cervical smear red blood cells present                                                                                      | K501.00 | Endometriosis of ovary                                       |
| PC4..00 | Cervical, vaginal and external female genital anomalies                                                                     | S77w100 | Ovary injury with open wound into cavity                     |
| PC1y.00 | Other fallopian tube and broad ligament anomalies                                                                           | PC40.00 | Cervical/vaginal/external female genital anomalies, unspec   |
| K555.00 | Incompetence of cervix                                                                                                      | K421z00 | Vaginitis and vulvovaginitis NOS                             |
| 7E22000 | Replantation of ovary                                                                                                       | 7D05500 | Biopsy of vulva                                              |
| 7E03.00 | Other operations on cervix uteri                                                                                            | B833500 | Vulval intraepithel neop grd 2                               |
| K557.00 | Mucous polyp of cervix                                                                                                      | 7D17.11 | Colporrhaphy and amputation of cervix uteri                  |

|         |                                                         |         |                                                             |
|---------|---------------------------------------------------------|---------|-------------------------------------------------------------|
| L246z11 | Polyp of cervix in pregnancy/childbirth/puerperium NOS  | B7B2.00 | Benign neoplasm of vulva                                    |
| 7E04.12 | Wertheim hysterectomy                                   | 4KK0.00 | Vaginal vault smear repeat at 6 months                      |
| 267..12 | O/E - vulva                                             | K516100 | Acquired vaginal enterocele                                 |
| K5B2300 | Blocked fallopian tube                                  | K56..00 | Noninflammatory vaginal disorders                           |
| 9O87.00 | Cervical smear - 3rd recall                             | PC43.00 | Rectovaginal fistula, congenital                            |
| 7E0Gy00 | Other specified other vaginal operation on uterus       | Kyu9B00 | [X]Other specified noninflammatory disorders/vulva+perineum |
| 7E1C100 | Endoscopic bilateral clipping of fallopian tubes        | K534200 | Displacement of the ovary and fallopian tube                |
| 7E03200 | Repair of cervical laceration                           | L245400 | Cervical incompetence with postnatal complication           |
| 7M14200 | Vaginal approach                                        | 7E11900 | Left salpingectomy                                          |
| L031000 | Fallopian tube pregnancy                                | 7NB5300 | [SO]Vulval vein                                             |
| 7D15300 | Cryotherapy to lesion of vagina                         | 7E23300 | Open drainage of cyst of ovary                              |
| B912.00 | Neoplasm of uncertain behaviour of ovary                | K425z00 | Ulceration of vulva NOS                                     |
| 7E12300 | Right oophorectomy NEC                                  | 7E1H100 | Hydrotubation of fallopian tube                             |
| B7A..11 | Dermoid cyst of ovary                                   | 7D02z00 | Excision of vulva NOS                                       |
| K425.00 | Ulceration of vulva                                     | 62O6.11 | Vaginal "show" - A/N                                        |
| 7D15100 | Laser destruction of lesion of vagina                   | K57..00 | Vulval and perineal noninflammatory disorders               |
| 15E..00 | Vulval irritation                                       | Kyu8400 | [X]Ulceration of vulva in infectious+parasitic diseases CE  |
| 7E16500 | Open clipping of left fallopian tube                    | 7E1F000 | Endoscopic freeing of adhesions of fallopian tube           |
| K577100 | Moderate vulvar dysplasia                               | 4JK2100 | High vaginal swab culture negative                          |
| K53z.00 | Ovarian, fallopian tube and broad ligament disorder NOS | 7D14000 | Laser excision of septum of vagina                          |
| S885z00 | Open wound of vulva with complication, NOS              | 2691.00 | O/E-vaginal speculum exam. NAD                              |
| 7D15400 | Implantation of radioactive substance into vagina       | SE24400 | Contusion, vagina                                           |
| 5B46.00 | Laser cervix lesion therapy                             | PC4yB00 | Atresia of vagina                                           |
| K424111 | Boil of vulva                                           | K5A3000 | Atrophy of vagina                                           |
| K562z11 | Vaginal band                                            | S885000 | Open wound of vulva with complication, unspecified          |
| 9O8g.00 | Cervical smear screening telephone invitation           | 7F1B500 | Deinfibulation of vulva to facilitate delivery              |
| 7E20.00 | Partial excision of ovary                               | 7E1..11 | Tubal operations - fallopian                                |
| PC4y911 | Congenital stricture of vagina                          | K402400 | Perioophoritis unspecified                                  |
| 7D14200 | Excision of transverse vaginal septum high              | 7E11500 | Oophorectomy of remaining solitary ovary NEC                |
| 279..00 | O/E - VE - cervical dilatation                          | 26A..00 | O/E - vaginal discharge                                     |
| 1A7..00 | Vaginal discharge symptom                               | 7D1C100 | Toilet to vagina                                            |

|         |                                                              |         |                                                              |
|---------|--------------------------------------------------------------|---------|--------------------------------------------------------------|
| L354z00 | Obstetric high vaginal laceration NOS                        | L246211 | Polyp of cervix - baby delivered+postpartum complication     |
| B454.11 | Primary vulval cancer                                        | K570000 | Kraurosis of vulva                                           |
| 7E25z00 | Therapeutic endoscopic operation on ovary NOS                | Z2A1.00 | Vulval toilet                                                |
| 7E04711 | Abdominal hysterectomy and left salpingoophorectomy          | 269A.00 | Uterine cervix transformation zone not visualised            |
| 7D13z00 | Obliteration of vagina NOS                                   | 4KA1.00 | Vaginal vault smear negative                                 |
| L354.11 | High vaginal laceration - obstetric                          | L411512 | Vaginal varices in pregnancy                                 |
| K53y400 | Infarction of fallopian tube                                 | PC4y411 | Rudimentary vagina                                           |
| 7E04600 | Radical hysterectomy                                         | K42z.00 | Cervical, vaginal and vulval inflammatory disease NOS        |
| 159B.00 | H/O: bilateral oophorectomy                                  | 4JK2400 | High vaginal swab: fungal organism isolated                  |
| K421.00 | Vaginitis and vulvovaginitis                                 | 7E00.00 | Excision of cervix uteri                                     |
| K553z00 | Old laceration of cervix NOS                                 | 7E04F00 | Subtotal abdominal hysterectomy with conservation of ovaries |
| B58y211 | Secondary cancer of the cervix                               | L247211 | Septate vagina - baby delivered with postpartum complication |
| B410.00 | Malignant neoplasm of endocervix                             | Q20y300 | Vulval haematoma due to birth trauma                         |
| L411z00 | Varicose veins of perineum/vulva in pregnancy/puerperium NOS | 7E13z11 | Partial salpingectomy NEC                                    |
| 9O8..12 | Cytology-cervical-admin                                      | PC4y000 | Congenital absence of cervix                                 |
| L247z11 | Septate vagina in pregnancy/childbirth/puerperium NOS        | K551300 | Mild cervical dysplasia                                      |
| 7D12200 | Marsupialisation of lesion of vagina                         | 7E14100 | Revision of tubal prosthesis in fallopian tube               |
| L248100 | Vulval abnormality - baby delivered                          | 7D19y00 | Other specified repair of vault of vagina                    |
| L345z00 | Vulval and perineal haematoma during delivery NOS            | B833311 | Vulval intraepithelial neoplasia                             |
| 7E1H300 | Insufflation of fallopian tube                               | SD17C00 | Splinter of vulva without major open wound, infected         |
| A913500 | Secondary syphilis of vulva                                  | SD1zD00 | Superficial injury of vagina NOS, infected                   |
| K511z00 | Uterine prolapse without vaginal wall prolapse NOS           | M181100 | Pruritus vulvae                                              |
| 7E04P00 | Radical hysterectomy with bilateral salpingo-oophorectomy    | 7E26y00 | Other specified diagnostic endoscopic examination of ovary   |
| 9kF9.11 | Low vaginal swab culture neg                                 | 7E15011 | Pomeroy open bilateral ligation of fallopian tubes           |
| 7D0z.00 | Vulva and female perineum operations NOS                     | 15H..00 | Vulval irritation                                            |
| L247z12 | Stenosis of vagina in pregnancy/childbirth/puerperium NOS    | PC02.00 | Ectopic ovary                                                |
| 7D05y00 | Other specified other operation on vulva                     | 268..12 | O/E - vaginal examination                                    |
| 7D03500 | Painting of vulval warts                                     | K567.00 | Polyp of vagina                                              |
| 7D03600 | Vulval polypectomy                                           | L247012 | Stenosis of vagina affecting obstetric care                  |
| 7E18200 | Anastomosis of fallopian tube NEC                            | 7E1H700 | Aspiration of fallopian tube                                 |

|         |                                                             |         |                                                      |
|---------|-------------------------------------------------------------|---------|------------------------------------------------------|
| 7E1H200 | Dye test of fallopian tube                                  | C164.00 | Polycystic ovaries                                   |
| B440.11 | Cancer of ovary                                             | 4K4Z.00 | Cervical smear action NOS                            |
| 7E01300 | Cryotherapy to lesion of cervix uteri                       | L340500 | Vulval tear during delivery                          |
| K502.00 | Endometriosis of the fallopian tube                         | 9O8b.00 | Cervical smear disclaimer sent                       |
| 4K4..00 | Cervical smear - action needed                              | Lyu3300 | [X]Maternal care for other abnormalities of cervix   |
| PC0z.00 | Congenital anomalies of ovaries NOS                         | K550000 | Erosion of cervix                                    |
| 7E21.00 | Open destruction of lesion of ovary                         | 15C..00 | Vaginal irritation                                   |
| 7E19100 | Drainage of fallopian tube                                  | K402.00 | Salpingitis and oophoritis unspecified               |
| 6859.00 | Ca cervix - screen done                                     | 4K2A.00 | Cervical smear endocervical cells present            |
| K42yz00 | Other cervical, vaginal and vulval disease NOS              | K513.00 | Uterovaginal prolapse, complete                      |
| 7E08100 | Dilation cervix & evacuation products conception uterus NEC | K533300 | Acquired absence of ovary or fallopian tube          |
| 4K3B.00 | Cervical smear - mild inflammation                          | 7F1B300 | Manual dilatation of cervix                          |
| PC41100 | Embryonal cyst of vagina                                    | 7E1B300 | Exploration of fallopian tube                        |
| 7E1Gz00 | Diagnostic endoscopic examination of fallopian tube NOS     | K401.00 | Chronic salpingitis and oophoritis                   |
| 7D1Cy00 | Other specified exploration of vagina                       | 65PP.00 | Trichomonas vaginalis contact                        |
| 7E05.00 | Vaginal excision of uterus                                  | K42y600 | Vulvodynia                                           |
| 4K37.00 | Cervical smear - herpes                                     | 7E03400 | Colposcopy of cervix                                 |
| 4K36.12 | HPV changes: cervical smear                                 | K553100 | Adhesions of cervix                                  |
| C164.13 | Multicystic ovaries                                         | B831000 | Carcinoma in situ of endocervix                      |
| 7D19500 | Sacrospinous fixation of vaginal vault                      | SG92111 | Tampon retained in vagina                            |
| 7E19y00 | Other specified incision of fallopian tube                  | L34y.00 | Other vulval and perineal trauma during delivery     |
| 7E1Gy00 | Diagnostic endoscopic examination of fallopian tube OS      | K562000 | Post-operative vaginal adhesions                     |
| K533.00 | Acquired atrophy of the ovary and fallopian tube            | Z263D00 | Intact membranes bulging through cervix              |
| 7B32300 | Total removal of tension-free vaginal tape                  | 7E05500 | Vaginal hysterectomy with conservation of ovaries    |
| 7E18100 | Replantation of fallopian tube                              | L247000 | Vaginal abnormality affecting obstetric care         |
| 981..11 | Cervical smear - fee claim                                  | ZG52100 | Advice on cervical cytology                          |
| 41F0.00 | Endocervical swab                                           | PC1yz00 | Other fallopian tube or broad ligament anomalies NOS |
| 7D11.00 | Other operations on introitus of vagina                     | R150.00 | [D]Nonspecific abnormal Papanicolaou cervical smear  |
| 7D10z00 | Incision of introitus of vagina NOS                         | 278..00 | O/E - VE - cervix ripeness                           |
| 4K33.00 | Cervical smear - trichomonas                                | K5E..00 | Other abnormal uterine and vaginal bleeding          |
| 7E12100 | Salpingectomy NEC                                           | 1AE..00 | Vaginal discomfort                                   |

|         |                                                             |         |                                                              |
|---------|-------------------------------------------------------------|---------|--------------------------------------------------------------|
| B833000 | Carcinoma in situ of ovary                                  | 7E17111 | Open removal of ring from fallopian tube NEC                 |
| K574000 | Old laceration of vulva                                     | Pyu6400 | [X]Other congenital malformations of vagina                  |
| 4K4E.00 | Cervical smear repeat at 24 months                          | K554z00 | Stricture and stenosis of cervix NOS                         |
| 7E1Fy00 | Other therapeutic endoscopic operation on fallopian tube OS | L248.00 | Congenital/acquired abnormality vulva in preg/childb/puerp   |
| 4K2R.00 | Cervical smear - human papillomavirus positive              | PC1y100 | Accessory fallopian tube                                     |
| K516.00 | Vaginal enterocele                                          | R128.00 | [D]Vaginal fluid abnormal                                    |
| 7E1F100 | Endoscopic injection into fallopian tube                    | 7E23000 | Transposition of ovary                                       |
| 4K34.00 | Cervical smear - candida                                    | Kyu9K00 | [X]Severe cervical dysplasia, not elsewhere classified       |
| 2696.00 | 360 degree sweep of cervix performed                        | 7E1D.00 | Other endoscopic occlusion of fallopian tube                 |
| 7D14.00 | Excision of band of vagina                                  | 4KA3.00 | Vaginal vault smear-atrophic                                 |
| 7E07011 | Dilation cervix uteri & curettage for termination pregnancy | L34..12 | Vulval delivery trauma                                       |
| 4K2K.00 | Cervical smear - high grade dyskaryosis (moderate)          | L246.12 | Stenosis of cervix in pregnancy, childbirth, puerperium      |
| 142E.00 | H/O: malignant neoplasm cervix                              | 4JK7.00 | Vaginal swab culture positive                                |
| L296.00 | Vaginal delivery following previous caesarean section       | K554200 | Occlusion of cervix                                          |
| 7D14100 | Excision of septum of vagina NEC                            | K554.00 | Stricture and stenosis of cervix                             |
| Ayu4L00 | [X]Vulval warts                                             | B450100 | Malignant neoplasm of vaginal vault                          |
| K560100 | Moderate vaginal dysplasia                                  | 1V05.00 | Misuses drugs vaginally                                      |
| 7E23400 | Oophorotomy and drainage of abscess                         | 15J..00 | Vulval rash                                                  |
| 4K2Z.00 | Cervical smear result NOS                                   | K562200 | Occlusion of vagina                                          |
| 4K2E.00 | Cervical smear transformation zone cells absent             | K42..00 | Cervical, vaginal and vulval inflammatory diseases           |
| L20..11 | Spontaneous vaginal delivery                                | K560.00 | Dysplasia of vagina                                          |
| 7D0y.00 | Other specified operations on vulva or female perineum      | PC1..00 | Fallopian tube and broad ligament anomalies                  |
| 4K2B.00 | Cervical smear endocervical cells absent                    | 7D19200 | Repair of vault of vagina using vaginal approach NEC         |
| 4K3Z.00 | Cervical smear - inflam. NOS                                | PC00.11 | Agenesis of ovary                                            |
| 9O8V.00 | Place cervical smear taken                                  | Kyu8600 | [X]Vulvovaginal ulceration+inflammation in other diseases CE |
| 7E00100 | Wedge excision of cervix uteri and suture HFQ               | 685Z.00 | Ca cervix screen NOS                                         |
| 7E01411 | Polypectomy of cervix                                       | 7F23200 | Immed repair obstetric laceration vagina and floor of pelvis |
| B48y100 | Malignant neoplasm of tunica vaginalis                      | AD10100 | Trichomonal vulvovaginitis                                   |
| L247212 | Stenosis of vagina - baby delivered+postpartum complication | 7E26.00 | Diagnostic endoscopic examination of ovary                   |
| 7E1F.11 | Other therapeutic laparoscic operations on fallopian tube   | 9O8d.00 | Cervical smear screening second letter                       |
| SP07900 | Problem with vaginal pessary                                | K551.00 | Dysplasia of cervix uteri                                    |

|         |                                                           |         |                                                              |
|---------|-----------------------------------------------------------|---------|--------------------------------------------------------------|
| 7E1E000 | Endoscopic removal of clip from fallopian tube            | 7E12200 | Oophorectomy NEC                                             |
| 7D17100 | Anterior colporrhaphy and amputation of cervix uteri NEC  | K400.00 | Acute salpingitis and oophoritis                             |
| ZV26112 | [V]Gamete intrafallopian transfer                         | 7E26.11 | Laparoscopy of ovary                                         |
| PC10.00 | Fallopian tube and broad ligament anomalies, unspecified  | PC01.00 | Accessory ovary                                              |
| 7E04E00 | Laparoscopic subtotal hysterectomy                        | 9KF9.00 | Low vaginal swab culture negative - enhanced services admini |
| K535z00 | Ovary, ovarian pedicle or fallopian tube torsion NOS      | L245100 | Cervical incompetence - delivered                            |
| Kyu9900 | [X]Other specified noninflammatory disorders/cervix uteri | PC4y600 | Congenital absence of vulva                                  |
| 7E1Dz00 | Endoscopic occlusion of fallopian tube NOS                | 7D17200 | Posterior colporrhaphy and amputation of cervix uteri NEC    |
| 7E22z00 | Repair of ovary NOS                                       | B410000 | Malignant neoplasm of endocervical canal                     |
| B441.00 | Malignant neoplasm of fallopian tube                      | 9Ndx.00 | Informed consent for cervical smear given                    |
| 7E05.11 | Schauta radical vaginal hysterectomy                      | 4K38.00 | Cervical smear - actinomyces                                 |
| 7E18z00 | Repair of fallopian tube NOS                              | 9O8a.00 | Cervical smear every 12 months for life                      |
| 7D1B500 | Renewal of supporting pessary in vagina                   | K57z.00 | Noninflammatory vulval and perineal disorder NOS             |
| 7D10.00 | Incision of introitus of vagina                           | K56yz00 | Other noninflammatory vaginal disorder NOS                   |
| 4K4D.00 | Cervical smear repeat at 48 months                        | B831.11 | CIN III - carcinoma in situ of cervix                        |
| 4JK6.00 | Vaginal swab culture negative                             | L247312 | Stenosis of vagina complicating a/n care- baby not delivered |
| 4K2..11 | Dyskaryosis on cervical smear                             | S884z00 | Open wound of vulva, NOS                                     |
| L246311 | Polyp of cervix complicating a/n care- baby not delivered | L39y411 | Postnatal vaginal discomfort                                 |
| K553.00 | Old laceration of cervix                                  | 7D17z00 | Repair of vaginal prolapse & amputation of cervix uteri NOS  |
| 4K32.00 | Cervical smear-severe inflamm.                            | K421200 | Vulvovaginitis unspecified                                   |
| 7E05300 | Vaginal hysterectomy NEC                                  | 7D04411 | Reconstruction of vulva with free flap                       |
| 4J17100 | Low vaginal swab culture                                  | B58y300 | Secondary malignant neoplasm of vagina                       |
| 7E26011 | Laparoscopic biopsy of ovary                              | ZV13D00 | [V]Personal history of severe cervical dysplasia             |
| K424200 | Furuncle of vulva                                         | K574100 | Old scarring of vulva                                        |
| 7E20y00 | Other specified partial excision of ovary                 | 9O8W.00 | Cervical smear to continue post hysterectomy                 |
| B58y400 | Secondary malignant neoplasm of vulva                     | 7C22000 | Construction of penis                                        |
| B410100 | Malignant neoplasm of endocervical gland                  | K56y.00 | Other noninflammatory vaginal disorders                      |
| 7D19011 | Zacharin repair of vaginal vault                          | 4K22.00 | Cervical smear: negative                                     |
| 14NF.00 | H/O: defibulation of vulva                                | S884000 | Open wound of vulva, unspecified                             |
| L248000 | Vulval abnormality affecting obstetric care               | 7E1H.00 | Other operations on fallopian tube                           |
| 7D1D000 | Freeing of adhesions of vagina                            | N331200 | Postoophorectomy osteoporosis with pathological fracture     |

|         |                                                              |         |                                                              |
|---------|--------------------------------------------------------------|---------|--------------------------------------------------------------|
| 7E1C300 | Endoscopic bilateral placement of intrafallopian implants    | K401000 | Chronic oophoritis                                           |
| 7E1C200 | Endoscopic bilateral ringing of fallopian tubes              | K56y111 | Bleeding - vaginal NOS                                       |
| A166111 | Fallopian tube tuberculosis                                  | Z257.13 | SVD - Spontaneous vaginal delivery                           |
| 7D05000 | Biopsy of lesion of vulva                                    | SD12C00 | Blister of vulva                                             |
| PC4yA00 | Atresia of cervix                                            | K577.00 | Dysplasia of vulva                                           |
| 7E2..00 | Ovary and broad ligament operations                          | SP0D100 | Hyperstimulation of ovaries                                  |
| 7E05z00 | Vaginal excision of uterus NOS                               | K512.00 | Uterovaginal prolapse, incomplete                            |
| 7B33A00 | Creation of urethrovaginal fistula                           | SD14C00 | Insect bite, nonvenomous, of vulva                           |
| 7E18y00 | Other specified repair of fallopian tube                     | L34..00 | Trauma to perineum and vulva during delivery                 |
| L411513 | Vulval varices in pregnancy                                  | 268..00 | O/E - bi-manual vaginal exam.                                |
| 7E02000 | Knife cone biopsy of cervix uteri                            | 7E05600 | Lap assist vag hysterectomy with bilat salpingo-oophorectomy |
| 7D17111 | Fothergill anterior colporrhaphy and amputation of cervix    | 7D1B100 | Insertion of ring into vagina                                |
| 7E13000 | Excision of lesion of fallopian tube                         | K400100 | Acute perioophoritis                                         |
| 7E1C000 | Endoscopic bilateral cauterisation of fallopian tubes        | ZV76200 | [V]Screening for malignant neoplasm of cervix                |
| L34zz00 | Vulval/perineal trauma during delivery NOS                   | 4K36.11 | Herpes: cervical smear                                       |
| 7E05700 | Vaginal hysterectomy and right salpingo-oophorectomy         | 7D03200 | Cryosurgery of lesion of vulva                               |
| K550211 | Ectopy of cervix                                             | K553200 | Cicatrix (postpartum) of cervix                              |
| L34z100 | Vulval/perineal trauma during delivery NOS - delivered       | 7E25100 | Endoscopic freeing of adhesions of ovary                     |
| PC03.00 | Streak ovary                                                 | K551z00 | Dysplasia of cervix NOS                                      |
| 7E04500 | Abdominal hysterectomy and bilateral salpingoophorectomy     | L34yz00 | Other vulval/perineal trauma during delivery NOS             |
| 8CEA.00 | Cervical smear information leaflet given                     | 6851.00 | Ca cervix screen - not offered                               |
| 7E1Fz00 | Other therapeutic endoscopic operation on fallopian tube NOS | 7F18.00 | Cephalic vaginal deliv abnorm presentation head - no instrum |
| 6793.00 | Health ed. - cervical cytology                               | B7B0.00 | Benign neoplasm of fallopian tubes and uterine ligaments     |
| 7E1G.00 | Diagnostic endoscopic examination of fallopian tube          | 7E19z00 | Incision of fallopian tube NOS                               |
| 7E21z00 | Open destruction of lesion of ovary NOS                      | 4KA2.00 | Vaginal vault smear-inadequate                               |
| 7E1Bz00 | Open operation on fallopian tube NOS                         | 7E1F.00 | Other therapeutic endoscopic operations on fallopian tube    |
| K566.00 | Vaginal haematoma                                            | 7N60211 | [SO]Skin of vulva                                            |
| 4K4B.00 | Cervical smear repeat at 36 months                           | Z246500 | Time vaginal show detected                                   |
| S77v000 | Fallopian tube injury without open wound into cavity         | K425000 | Ulceration of vulva unspecified                              |
| SD17D00 | Splinter of vagina without major open wound, infected        | Q41y111 | Perinatal transient vaginal bleeding                         |
| 7D19.00 | Repair of vault of vagina                                    | 7E1G.11 | Laparoscopy of fallopian tube                                |



|         |                                                              |         |                                                                 |
|---------|--------------------------------------------------------------|---------|-----------------------------------------------------------------|
| 7E1B200 | Open dilation of fallopian tube                              | 7E11800 | Right salpingectomy                                             |
| 7E05100 | Vaginal hysterectomy and excision of periuterine tissue NEC  | K5B5.00 | Female infertility of vaginal origin                            |
| 4JKD.00 | Low vaginal swab for chlamydia taken by patient              | L247100 | Vaginal abnormality - baby delivered                            |
| 7E11600 | Right salpingoophorectomy                                    | K53y500 | Rupture of fallopian tube                                       |
| 7D1D.00 | Other operations on vagina                                   | 7D03211 | Cryotherapy of lesion of vulva                                  |
| K515.00 | Post hysterectomy vaginal vault prolapse                     | 7E1..00 | Fallopian tube operations                                       |
| K576.00 | Polyp of labia and vulva                                     | 7D05.00 | Other operations on vulva                                       |
| K520100 | Ureterovaginal fistula                                       | K5Ez.00 | Abnormal uterine and vaginal bleeding, unspecified              |
| K562.00 | Stricture or atresia of the vagina                           | 7B32z00 | Vaginal operation to support outlet of female bladder NOS       |
| 7B30z00 | Combined abdo & vaginal op to support outlet fem bladder NOS | L354.12 | High vaginal tear - obstetric                                   |
| AD10011 | Flour vaginalis - trichomonal                                | K425200 | Ulceration of vulva in Behcet's disease                         |
| K55y400 | Hypertrophy of cervix                                        | L411400 | VV's of perineum/vulva in pregnancy/puerperium + p/n comp       |
| K577W00 | Dysplasia of vulva, unspecified                              | 7E02100 | Laser cone biopsy of cervix uteri                               |
| 7E14200 | Removal of tubal prosthesis from fallopian tube              | L245z00 | Cervical incompetence NOS                                       |
| K570z00 | Dystrophy of vulva NOS                                       | Kyu8500 | [X]Vaginits,vulvits+vulvovaginitis/infect+parasitic diseases CE |
| 7D10y00 | Other specified incision of introitus of vagina              | ZV25600 | [V]Failed interruption of fallopian tubes                       |
| 7E04400 | Subtotal abdominal hysterectomy                              | 7E0G.00 | Other vaginal operations on uterus                              |
| 7E16100 | Open ligation of fallopian tube NEC                          | 7E23200 | Open biopsy of lesion of ovary                                  |
| B454.00 | Malignant neoplasm of vulva unspecified                      | L245200 | Cervical incompetence - delivered with postnatal comp           |
| 7D04400 | Reconstruction of vulva with microvascular transferred flap  | 7D1A000 | Unspecified repair of vesicovaginal fistula                     |
| ZV76212 | [V]Routine cervical smear                                    | 1A71.00 | Vaginal discharge absent                                        |
| L245300 | Cervical incompetence with antenatal problem                 | 7E1By00 | Other specified open operation on fallopian tube                |
| 14NF000 | H/O: defibulation of vulva to facilitate delivery            | 7D19400 | Suspension of vagina NEC                                        |
| B411.00 | Malignant neoplasm of exocervix                              | K42y000 | Carbuncle of vagina                                             |
| 7E04512 | TAH - total abdom hysterectomy & bilateral salpingoophorect  | B833400 | Vulval intraepithel neop grd 1                                  |
| K42y.00 | Other cervical, vaginal and vulval diseases                  | 7E1Hy00 | Other specified other operation on fallopian tube               |
| 7D1D211 | Biopsy of vaginal wall                                       | K400200 | Acute salpingo-oophoritis                                       |
| 7E0G000 | Vaginal excision of lesion of uterus                         | L248200 | Vulval abnormality - baby delivered+postpartum complication     |
| 7D04000 | Unspecified repair of vulva                                  | PC05.00 | Congenital torsion of ovary                                     |
| 7D04.11 | Reconstruction of vulva                                      | 7E1C.00 | Endoscopic bilateral occlusion of fallopian tubes               |



|         |                                                              |         |                                                              |
|---------|--------------------------------------------------------------|---------|--------------------------------------------------------------|
| 7D04.00 | Repair of vulva                                              | K50y300 | Endometriosis of the vulva                                   |
| PC00.00 | Congenital absence of ovary                                  | K41..00 | Uterine inflammatory diseases excluding the cervix           |
| ZX16400 | Gouging own vagina                                           | Q476.11 | Patent processus vaginalis                                   |
| 7E1D200 | Endoscopic occlusion of left fallopian tube                  | 7E02300 | Punch biopsy of cervix uteri                                 |
| K535200 | Torsion of the fallopian tube                                | 1591.00 | H/O: recurrent vaginal disch.                                |
| B7B1z00 | Benign neoplasm vagina NOS                                   | 7D05600 | Vulvoscopy                                                   |
| 7D03z00 | Extirpation of lesion of vulva NOS                           | SD1yC00 | Superficial injury of vulva NOS, without major open wound    |
| 7D03y00 | Other specified extirpation of lesion of vulva               | B831.00 | Carcinoma in situ of cervix uteri                            |
| K55y000 | Senile atrophy of cervix                                     | 7E2A211 | Cervical smear NEC                                           |
| 7E16211 | Open clipping of residual solitary fallopian tube            | 7N60200 | [SO]Vulva                                                    |
| 7D15200 | Cauterisation of lesion of vagina                            | K574.00 | Old laceration or scarring of vulva                          |
| 7B32000 | Vaginal buttressing of urethra                               | 7E04K00 | Subtotal abdominal hysterectomy & left salpingo-oophorectomy |
| B7B1000 | Skin tag in vagina                                           | K400.11 | Oophoritis - acute                                           |
| K550100 | Ulcer of cervix                                              | 7E2Bz00 | Other operations on ovary NOS                                |
| K521200 | Rectovaginal fistula                                         | L34z200 | Vulval/perineal trauma during delivery NOS with p/n problem  |
| K576z00 | Polyp of labia and vulva NOS                                 | K504z00 | Endometriosis of the rectovaginal septum and vagina NOS      |
| 7E04H00 | Subtotl abdominal hysterectomy & bilat salpingo-oophorectomy | 4K2Q.00 | Cervical smear - human papillomavirus negative               |
| L03y000 | Cervical pregnancy                                           | 7E07200 | Dilation of cervix uteri and curettage of uterus NEC         |
| K554.11 | Stenosis of cervix uteri                                     | 7D1Ay00 | Other specified other repair of vagina                       |
| K56X.00 | Severe vaginal dysplasia, not elsewhere classified           | 7N62100 | [SO]Fallopian tube                                           |
| K530.00 | Follicular cyst of ovary                                     | 7D13y00 | Other specified obliteration of vagina                       |
| 7E02011 | Sturmdorf conisation of cervix uteri                         | PC1z.00 | Fallopian tube or broad ligament anomalies NOS               |
| 7D03300 | Cauterisation of lesion of vulva                             | PC41z00 | Embryonic cyst cervix/vagina/external female genitalia NOS   |
| Q414300 | Neonatal vaginal haemorrhage                                 | L092300 | Cervix damage following abortive pregnancy                   |
| K562.11 | Adhesions of vagina                                          | L345000 | Vulval and perineal haematoma during delivery, unspecified   |
| 1A58100 | Vulval pain                                                  | 7E14000 | Insertion of tubal prosthesis into fallopian tube            |
| 7E06y11 | Vaginal myomectomy                                           | K55y200 | Fibrosis of cervix                                           |
| 7E1H411 | Dilation of fallopian tube NEC                               | B833200 | Carcinoma in situ of vagina                                  |
| 7D03011 | Biopsy of vulva                                              | L353.11 | Laceration of cervix - obstetric                             |
| 6858.00 | Ca cervix screen - not reached                               | K532000 | Corpus albicans cyst of the ovary                            |

|         |                                                              |         |                                                       |
|---------|--------------------------------------------------------------|---------|-------------------------------------------------------|
| 7E01600 | Cold coagulation of lesion of cervix                         | 7E1H600 | Recanalisation of fallopian tube                      |
| 7D03000 | Excision of lesion of vulva NEC                              | 7D1Bz00 | Introduction of supporting pessary into vagina NOS    |
| 981..00 | FP74 - cervical cytology claim                               | L247.12 | Stenosis of vagina in pregnancy/childbirth/puerperium |
| 7E04900 | TAH - Tot abdom hysterectomy and BSO - bilat salpingophorect | 7D15z00 | Extirpation of lesion of vagina NOS                   |
| SD13D00 | Blister of vagina, infected                                  | L354100 | Obstetric high vaginal laceration - delivered         |
| L246411 | Polyp of cervix complicating p/n care - baby deliv prev      | K423.11 | Vulvovaginal gland abscess                            |
| 4K2H.00 | Cervical smear epithelial cells absent                       | 9EVC.00 | Cervical smear report received                        |
| 7E04B00 | Lapar total abdominal hysterect bilat salpingo-oophorectomy  | PC41300 | Embryonic cyst of cervix                              |
| B586.00 | Secondary malignant neoplasm of ovary                        | 685H.11 | No smear - hysterectomy                               |
| PC0y.00 | Other specified congenital anomalies of ovaries              | 8572.00 | Vibration of cervix                                   |
| K533z00 | Acquired atrophy of the ovary and fallopian tube NOS         | K400700 | Subacute salpingo-oophoritis                          |
| 7E04C00 | Laparoscopic hysterectomy                                    | 7D1A500 | Vaginal repair of vesicovaginal fistula               |
| K421111 | Vulval sores                                                 | S77A.00 | Injury of fallopian tube                              |
| K504100 | Endometriosis of the vagina                                  | 1ABH.00 | Vaginal penetrative sexual intercourse                |
| K550200 | Ectropion (eversion) of cervix                               | K57y200 | Stricture of vulva                                    |
| L354000 | Obstetric high vaginal laceration unspecified                | 7E23700 | Open diagnostic aspiration of ovary                   |
| 7E16411 | Open ringing of right fallopian tube                         | PC4y100 | Agenesis of cervix                                    |
| K500200 | Endometriosis of cervix                                      | Z254900 | Vaginal delivery                                      |
| PC4yw00 | Other congenital anomaly of vagina                           | 58D3.00 | Transvaginal ultrasound scan                          |
| K424100 | Carbuncle of vulva                                           | 7E17100 | Open removal of clip from fallopian tube NEC          |
| 7E23600 | Oophorotomy                                                  | BB80200 | [M]Borderline mucinous cystadenoma of the ovary       |
| 14l..00 | H/O abnormal cervical smear                                  | L353000 | Obstetric laceration of cervix unspecified            |
| 7B32200 | Introduction of tension free vaginal tape                    | 1A7Z.00 | Vaginal discharge NOS                                 |
| B833800 | Vaginal intraepithelial neoplasia grade 2                    | 7E24300 | Transvaginal oocyte recovery                          |
| 7E04311 | Bonney abdominal hysterectomy                                | K576100 | Polyp of vulva                                        |
| K574z00 | Old laceration or scar of vulva NOS                          | 7E16.12 | Unilateral occlusion of fallopian tube                |
| Kyu9A00 | [X]Other specified noninflammatory disorders of vagina       | 278Z.00 | O/E - VE - cervix ripeness NOS                        |
| 1AD..00 | Vaginal dryness                                              | 7E02200 | Cone biopsy of cervix uteri NEC                       |
| 7E16212 | Open ringing of remaining solitary fallopian tube            | K401z00 | Chronic salpingitis and oophoritis NOS                |
| 7E04300 | Total abdominal hysterectomy NEC                             | 7D03312 | Diathermy of vulval lesion                            |

|         |                                                              |         |                                                              |
|---------|--------------------------------------------------------------|---------|--------------------------------------------------------------|
| L248400 | Vulval abn complicating p/n care - baby delivered previously | 7E1D000 | Endoscopic occlusion of remaining solitary fallopian tube    |
| 4JK..11 | Vaginal swab taken                                           | 67DA.00 | Provision of information about cervical screening programme  |
| B450.00 | Malignant neoplasm of vagina                                 | L092600 | Vaginal damage following abortive pregnancy                  |
| 7E00200 | Excision of lesion of cervix uteri                           | 7E13y00 | Other specified partial excision of fallopian tube           |
| B7A..00 | Benign neoplasm of ovary                                     | 7E03y00 | Other specified other operation on cervix uteri              |
| 7E25200 | Endoscopic drainage of cyst of ovary                         | 7B30.00 | Combin abdominal & vaginal ops support outlet female bladder |
| K5E2.00 | Abnormal vaginal bleeding, unspecified                       | L34z000 | Vulval/perineal trauma during delivery NOS unspec            |
| K521100 | Intestinovaginal fistula                                     | K565.12 | Vaginal discharge NOS                                        |
| 7D04z00 | Repair of vulva NOS                                          | 4KA4.00 | Vaginal vault smear abnormal                                 |
| K533100 | Senile involution of the ovary                               | 4K55.00 | Cervical cytology test                                       |
| 4K3C.00 | Cervical smear - moderate inflammation                       | 7E01z00 | Destruction of lesion of cervix uteri NOS                    |
| K577X00 | Severe vulvar dysplasia, not elsewhere classified            | 7E16000 | Open ligation of remaining solitary fallopian tube           |
| K57y.00 | Other noninflammatory vulval and perineal disorders          | 7E15111 | Open bilateral ringing of fallopian tubes                    |
| A166000 | Tuberculous oophoritis                                       | K521300 | Rectovulval fistula                                          |
| K532300 | Simple cystoma of the ovary                                  | 7E21000 | Open cauterisation of lesion of ovary                        |
| 7E15.00 | Open bilateral occlusion of fallopian tubes                  | SH74.00 | Burn of the vagina and uterus                                |
| L247400 | Vaginal abnormality complicating p/n care - baby deliv prev  | L354.00 | Obstetric high vaginal laceration                            |
| 7D1Dy00 | Other specified other operation on vagina                    |         |                                                              |
| K550z00 | Erosion and ectropion of the cervix NOS                      |         |                                                              |
| L411100 | VV's of perineum/vulva in pregnancy/puerperium - delivered   |         |                                                              |
| 7E14.00 | Placement of prosthesis in fallopian tube                    |         |                                                              |
| 7F06100 | Removal of cerclage from cervix of gravid uterus             |         |                                                              |
| L411000 | VV's of perineum/vulva in pregnancy/puerperium unspecified   |         |                                                              |
| AB21z11 | Candidiasis cervix                                           |         |                                                              |
| 2782.00 | O/E - VE - cervix ripe                                       |         |                                                              |
| Pyu6000 | [X]Other congenital malformations of ovary                   |         |                                                              |

| Year | Rate of newly-recorded transgender identity coding, per 100,000 person years (95% confidence interval) |                     |                      |                     |                  |                  |                  |                  |
|------|--------------------------------------------------------------------------------------------------------|---------------------|----------------------|---------------------|------------------|------------------|------------------|------------------|
|      | Age group                                                                                              |                     |                      |                     |                  |                  |                  |                  |
|      | 10-12                                                                                                  | 13-15               | 16-17                | 18-29               | 30-39            | 40-49            | 50+              | All age groups   |
| 2000 | 2.84 (0.34-10.27)                                                                                      | -                   | -                    | 3.02 (1.38-5.73)    | 2.53 (1.16-4.81) | 1.92 (0.70-4.17) | 0.25 (0.03-0.92) | 1.45 (0.96-2.10) |
| 2001 | -                                                                                                      | -                   | 4.01 (0.49-14.47)    | 1.43 (0.46-3.33)    | 1.41 (0.52-3.06) | 1.84 (0.74-3.79) | 0.84 (0.36-1.66) | 1.21 (0.80-1.74) |
| 2002 | -                                                                                                      | -                   | 1.64 (0.04-9.15)     | 0.48 (0.06-1.72)    | 0.80 (0.22-2.04) | 1.53 (0.62-3.15) | 0.27 (0.06-0.78) | 0.62 (0.36-0.99) |
| 2003 | -                                                                                                      | 0.91 (0.02-5.05)    | -                    | 1.49 (0.60-3.07)    | 2.36 (1.26-4.04) | 1.16 (0.43-2.53) | 0.24 (0.05-0.70) | 0.97 (0.66-1.39) |
| 2004 | 0.79 (0.02-4.42)                                                                                       | 0.81 (0.02-4.50)    | 1.27 (0.03-7.05)     | 2.12 (1.06-3.8)     | 1.52 (0.70-2.89) | 1.22 (0.49-2.51) | 0.29 (0.08-0.75) | 1.00 (0.70-1.40) |
| 2005 | -                                                                                                      | -                   | 1.18 (0.03-6.59)     | 1.64 (0.75-3.11)    | 1.32 (0.57-2.61) | 0.81 (0.26-1.90) | 0.62 (0.28-1.18) | 0.90 (0.61-1.27) |
| 2006 | -                                                                                                      | 1.48 (0.18-5.34)    | 2.27 (0.27-8.20)     | 1.05 (0.39-2.29)    | 0.83 (0.27-1.94) | 1.71 (0.86-3.07) | 0.47 (0.19-0.96) | 0.90 (0.62-1.26) |
| 2007 | 0.71 (0.02-3.95)                                                                                       | 0.72 (0.02-4.03)    | -                    | 2.35 (1.28-3.94)    | 0.67 (0.18-1.70) | 0.90 (0.33-1.96) | 0.52 (0.22-1.02) | 0.90 (0.62-1.26) |
| 2008 | -                                                                                                      | -                   | 2.12 (0.26-7.67)     | 0.81 (0.26-1.89)    | 0.67 (0.18-1.72) | 0.73 (0.24-1.71) | 0.63 (0.30-1.16) | 0.67 (0.44-0.99) |
| 2009 | -                                                                                                      | 1.40 (0.17-5.05)    | 6.36 (2.33-13.85)    | 2.22 (1.22-3.73)    | 1.69 (0.81-3.11) | 1.16 (0.50-2.29) | 0.37 (0.14-0.82) | 1.18 (0.86-1.57) |
| 2010 | -                                                                                                      | 0.71 (0.02-3.96)    | 3.27 (0.68-9.57)     | 3.25 (1.99-5.02)    | 2.46 (1.34-4.12) | 1.78 (0.92-3.12) | 0.57 (0.26-1.08) | 1.55 (1.18-2.00) |
| 2011 | 0.69 (0.02-3.85)                                                                                       | 1.39 (0.17-5.03)    | 10.75 (5.16-19.77)   | 3.21 (1.96-4.96)    | 1.41 (0.61-2.77) | 2.66 (1.58-4.21) | 0.44 (0.17-0.90) | 1.71 (1.32-2.18) |
| 2012 | 0.70 (0.02-3.88)                                                                                       | 1.37 (0.17-4.94)    | 10.65 (5.10-19.58)   | 4.29 (2.83-6.24)    | 3.01 (1.75-4.82) | 1.78 (0.92-3.12) | 0.55 (0.25-1.05) | 2.01 (1.59-2.51) |
| 2013 | 0.72 (0.02-4.04)                                                                                       | 6.39 (2.92-12.13)   | 14.22 (7.57-24.32)   | 3.79 (2.40-5.69)    | 1.85 (0.89-3.40) | 1.72 (0.86-3.08) | 0.25 (0.07-0.65) | 1.90 (1.48-2.40) |
| 2014 | 0.77 (0.02-4.27)                                                                                       | 7.58 (3.63-13.94)   | 17.2 (9.63-28.38)    | 7.52 (5.44-10.13)   | 3.75 (2.25-5.85) | 1.70 (0.81-3.12) | 0.46 (0.19-0.96) | 2.98 (2.43-3.60) |
| 2015 | 4.38 (1.42-10.23)                                                                                      | 22.45 (14.53-33.14) | 37.39 (24.84-54.04)  | 15.82 (12.49-19.78) | 2.76 (1.43-4.83) | 2.24 (1.12-4.01) | 1.54 (0.94-2.38) | 5.92 (5.08-6.85) |
| 2016 | 7.34 (2.95-15.13)                                                                                      | 30.61 (20.34-44.24) | 48.87 (32.97-69.77)  | 17.31 (13.47-21.91) | 3.33 (1.72-5.81) | 4.08 (2.33-6.62) | 0.84 (0.39-1.60) | 6.93 (5.93-8.05) |
| 2017 | 2.47 (0.30-8.92)                                                                                       | 33.70 (22.01-49.37) | 48.59 (31.45-71.73)  | 15.23 (11.27-20.14) | 2.99 (1.37-5.68) | 3.72 (1.92-6.50) | 0.77 (0.31-1.59) | 6.31 (5.27-7.49) |
| 2018 | 7.01 (2.28-16.36)                                                                                      | 37.67 (24.61-55.20) | 78.39 (54.60-109.02) | 18.69 (13.88-24.65) | 3.92 (1.88-7.22) | 2.92 (1.26-5.75) | 0.74 (0.27-1.61) | 7.81 (6.57-9.22) |

Supplementary table 4: rates of first-recorded transgender identity, by age group and year, between 2000-2018. “-“ indicates a rate of zero.

| Year | Proportion with recorded transgender identity, per 10,000 (95% confidence interval) |                  |                     |                     |                  |                  |                  |                  |
|------|-------------------------------------------------------------------------------------|------------------|---------------------|---------------------|------------------|------------------|------------------|------------------|
|      | Age group                                                                           |                  |                     |                     |                  |                  |                  |                  |
|      | 10-12                                                                               | 13-15            | 16-17               | 18-29               | 30-39            | 40-49            | 50+              | All age groups   |
| 2000 | -                                                                                   | 0.20 (0.01-1.11) | -                   | 0.73 (0.41-1.21)    | 1.15 (0.78-1.65) | 1.25 (0.84-1.78) | 0.34 (0.21-0.53) | 0.68 (0.55-0.83) |
| 2001 | -                                                                                   | 0.30 (0.04-1.07) | -                   | 0.96 (0.63-1.41)    | 1.16 (0.83-1.59) | 1.41 (1.03-1.89) | 0.47 (0.33-0.65) | 0.80 (0.68-0.94) |
| 2002 | 0.17 (0-0.95)                                                                       | 0.24 (0.03-0.87) | 0.19 (0-1.07)       | 0.8 (0.52-1.17)     | 1.23 (0.92-1.62) | 1.49 (1.14-1.93) | 0.53 (0.40-0.70) | 0.83 (0.72-0.96) |
| 2003 | -                                                                                   | 0.10 (0-0.57)    | 0.49 (0.10-1.42)    | 0.87 (0.60-1.22)    | 1.52 (1.19-1.92) | 1.67 (1.31-2.08) | 0.64 (0.50-0.80) | 0.96 (0.85-1.09) |
| 2004 | -                                                                                   | -                | 0.71 (0.23-1.65)    | 0.79 (0.55-1.1)     | 1.64 (1.31-2.03) | 1.73 (1.39-2.12) | 0.73 (0.59-0.89) | 1.02 (0.91-1.14) |
| 2005 | 0.12 (0-0.67)                                                                       | -                | 0.25 (0.03-0.91)    | 0.83 (0.60-1.14)    | 1.70 (1.37-2.09) | 1.89 (1.55-2.27) | 0.86 (0.71-1.03) | 1.11 (1.00-1.23) |
| 2006 | 0.12 (0-0.65)                                                                       | 0.08 (0-0.43)    | 0.24 (0.03-0.86)    | 1.14 (0.87-1.48)    | 1.76 (1.43-2.15) | 2.02 (1.68-2.41) | 0.97 (0.82-1.15) | 1.24 (1.12-1.36) |
| 2007 | 0.11 (0-0.63)                                                                       | 0.15 (0.02-0.55) | 0.23 (0.03-0.83)    | 1.12 (0.85-1.44)    | 2.03 (1.67-2.45) | 2.04 (1.70-2.42) | 1.08 (0.92-1.26) | 1.33 (1.21-1.45) |
| 2008 | 0.11 (0-0.60)                                                                       | 0.22 (0.05-0.65) | 0.22 (0.03-0.81)    | 1.08 (0.83-1.40)    | 1.87 (1.53-2.27) | 2.16 (1.82-2.55) | 1.23 (1.06-1.42) | 1.38 (1.26-1.51) |
| 2009 | 0.21 (0.03-0.77)                                                                    | 0.37 (0.12-0.86) | 0.68 (0.25-1.49)    | 1.29 (1.01-1.63)    | 1.74 (1.41-2.14) | 2.43 (2.07-2.84) | 1.32 (1.15-1.52) | 1.50 (1.38-1.63) |
| 2010 | 0.21 (0.03-0.78)                                                                    | 0.22 (0.05-0.65) | 0.69 (0.25-1.49)    | 1.40 (1.11-1.75)    | 2.14 (1.77-2.58) | 2.70 (2.31-3.13) | 1.48 (1.30-1.69) | 1.69 (1.55-1.83) |
| 2011 | 0.33 (0.07-0.97)                                                                    | 0.29 (0.08-0.75) | 1.73 (0.97-2.85)    | 1.81 (1.47-2.21)    | 2.33 (1.92-2.78) | 2.98 (2.56-3.43) | 1.61 (1.41-1.82) | 1.91 (1.76-2.06) |
| 2012 | 0.33 (0.07-0.97)                                                                    | 0.43 (0.16-0.94) | 1.91 (1.11-3.06)    | 2.42 (2.03-2.86)    | 2.45 (2.04-2.91) | 2.76 (2.36-3.20) | 1.71 (1.51-1.93) | 2.03 (1.88-2.18) |
| 2013 | 0.59 (0.19-1.37)                                                                    | 0.69 (0.32-1.32) | 2.13 (1.26-3.36)    | 3.09 (2.64-3.61)    | 2.28 (1.88-2.75) | 2.95 (2.52-3.42) | 1.76 (1.56-1.99) | 2.19 (2.03-2.35) |
| 2014 | 0.51 (0.14-1.30)                                                                    | 1.27 (0.71-2.10) | 1.78 (0.97-2.99)    | 3.91 (3.37-4.51)    | 2.68 (2.22-3.22) | 2.94 (2.49-3.44) | 1.87 (1.65-2.11) | 2.42 (2.25-2.60) |
| 2015 | 0.62 (0.17-1.58)                                                                    | 1.90 (1.12-3.00) | 6.54 (4.72-8.85)    | 5.98 (5.24-6.80)    | 2.45 (1.96-3.01) | 3.29 (2.76-3.90) | 1.86 (1.61-2.13) | 2.91 (2.70-3.13) |
| 2016 | 0.35 (0.04-1.27)                                                                    | 4.35 (3.04-6.02) | 8.95 (6.64-11.79)   | 8.28 (7.35-9.31)    | 2.82 (2.27-3.46) | 3.17 (2.61-3.82) | 2.08 (1.80-2.39) | 3.55 (3.30-3.81) |
| 2017 | 0.79 (0.22-2.03)                                                                    | 5.94 (4.28-8.02) | 11.06 (8.26-14.51)  | 9.65 (8.54-10.87)   | 3.80 (3.11-4.61) | 3.50 (2.86-4.25) | 2.09 (1.79-2.43) | 4.05 (3.77-4.35) |
| 2018 | 1.07 (0.35-2.49)                                                                    | 5.86 (4.15-8.04) | 16.23 (12.60-20.57) | 12.42 (11.06-13.90) | 4.62 (3.8-5.58)  | 3.25 (2.59-4.03) | 2.3 (1.98-2.66)  | 4.71 (4.38-5.05) |

**Supplementary table 5: proportion of people with recorded transgender identity, by age group and year, between 2000-2018. “-“ indicates a proportion of zero.**

|                                                   | Rate of newly-recorded codes, per 100,000 person-years (95% CI) | Incidence rate ratio* (95% CI) | Proportion of people with transgender identity, per 10,000 (95% CI) | Prevalence rate ratio* (95% CI) |
|---------------------------------------------------|-----------------------------------------------------------------|--------------------------------|---------------------------------------------------------------------|---------------------------------|
| <b>Age group (years) [between 2000-2009 only]</b> |                                                                 |                                |                                                                     |                                 |
| 10-12                                             | 0.33 (0.09-0.85)                                                | 0.17 (0.06-0.51)               | 0.10 (0.04-0.2)                                                     | 0.29 (0.12-0.68)                |
| 13-15                                             | 0.60 (0.24-1.24)                                                | 0.30 (0.12-0.74)               | 0.16 (0.09-0.26)                                                    | 0.48 (0.26-0.90)                |
| 16-17                                             | 1.99 (1.11-3.28)                                                | 1                              | 0.34 (0.21-0.5)                                                     | 1                               |
| 18-29                                             | 1.63 (1.3-2.03)                                                 | 0.78 (0.45-1.36)               | 1.00 (0.91-1.1)                                                     | 2.73 (1.80-4.16)                |
| 30-39                                             | 1.33 (1.04-1.67)                                                | 0.67 (0.38-1.17)               | 1.64 (1.52-1.76)                                                    | 4.87 (3.22-7.38)                |
| 40-49                                             | 1.23 (0.95-1.56)                                                | 0.65 (0.37-1.14)               | 1.90 (1.78-2.02)                                                    | 5.87 (3.88-8.87)                |
| 50+                                               | 0.46 (0.35-0.59)                                                | 0.24 (0.14-0.43)               | 0.89 (0.84-0.95)                                                    | 2.83 (1.88-4.29)                |

*\*adjusted for age group, Townsend deprivation score, and calendar year  
95% CI = 95% confidence interval*

**Supplementary table 6: Rates of new recording and proportions of transgender identity per age group, between 2000-2009.**
